# Supplementary material for: NUP155 insufficiency recalibrates a pluripotent transcriptome with network remodeling of a cardiogenic signaling module
Source: Springer Nature journal article supplement (doi:10.1186/s12918-018-0590-x), 2018-05-30
Supplement: 12918_2018_590_MOESM1_ESM.pdf [file 12918_2018_590_MOESM1_ESM.pdf]

**Supplemental Material.**

**Supplemental File 1.**

**Pathway Enrichment Analysis of Upregulated Genes.**

Functional enrichment analysis was performed through DAVID using the highest stringency. Depicted below are the 14 functional clusters extracted from the statistically significant upregulated gene list.

| Cluster                             | Category                                                            | Term                                                                          | Count | %     | Entrez Gene IDs                                                       | PValue          | Fold Enrichment |
|-------------------------------------|---------------------------------------------------------------------|-------------------------------------------------------------------------------|-------|-------|-----------------------------------------------------------------------|-----------------|-----------------|
| Cluster 1<br>Enrichment Score: 1.84 | UP_SEQ_FEATURE                                                      | short sequence motif:GFFKR motif                                              | 3     | 1.705 | 16402, 381924, 16399                                                  | 0.005           | 27.897          |
|                                     | INTERPRO                                                            | IPR018184:Integrin alpha chain, C-terminal cytoplasmic region, conserved site | 3     | 1.705 |                                                                       | 0.007           | 22.714          |
|                                     | INTERPRO                                                            | IPR000413:Integrin alpha chain                                                | 3     | 1.705 |                                                                       | 0.008           | 21.452          |
|                                     | INTERPRO                                                            | IPR013649:Integrin alpha-2                                                    | 3     | 1.705 |                                                                       | 0.008           | 21.452          |
|                                     | INTERPRO                                                            | IPR013517:FG-GAP repeat                                                       | 3     | 1.705 |                                                                       | 0.008           | 21.452          |
|                                     | UP_SEQ_FEATURE                                                      | repeat:FG-GAP 7                                                               | 3     | 1.705 |                                                                       | 0.008           | 21.333          |
|                                     | UP_SEQ_FEATURE                                                      | repeat:FG-GAP 5                                                               | 3     | 1.705 |                                                                       | 0.008           | 21.333          |
|                                     | UP_SEQ_FEATURE                                                      | repeat:FG-GAP 6                                                               | 3     | 1.705 |                                                                       | 0.008           | 21.333          |
|                                     | UP_SEQ_FEATURE                                                      | repeat:FG-GAP 3                                                               | 3     | 1.705 |                                                                       | 0.008           | 21.333          |
|                                     | UP_SEQ_FEATURE                                                      | repeat:FG-GAP 4                                                               | 3     | 1.705 |                                                                       | 0.008           | 21.333          |
|                                     | UP_SEQ_FEATURE                                                      | repeat:FG-GAP 1                                                               | 3     | 1.705 |                                                                       | 0.008           | 21.333          |
|                                     | UP_SEQ_FEATURE                                                      | repeat:FG-GAP 2                                                               | 3     | 1.705 |                                                                       | 0.008           | 21.333          |
|                                     | INTERPRO                                                            | IPR013519:Integrin alpha beta-propellor                                       | 3     | 1.705 |                                                                       | 0.009           | 20.323          |
|                                     | SMART                                                               | SM00191:Int_alpha                                                             | 3     | 1.705 |                                                                       | 0.012           | 17.511          |
|                                     | GOTERM_CC_DIRECT                                                    | GO:0008305~integrin complex                                                   | 3     | 1.705 |                                                                       | 0.016           | 15.321          |
|                                     | UP_KEYWORDS                                                         | Integrin                                                                      | 3     | 1.705 |                                                                       | 0.059           | 7.596           |
|                                     | GOTERM_BP_DIRECT                                                    | GO:0007229~integrin-mediated signaling pathway                                | 3     | 1.705 |                                                                       | 0.168           | 4.051           |
| KEGG_PATHWAY                        | mmu04810:Regulation of actin cytoskeleton                           | 3                                                                             | 1.705 | 0.550 | 1.615                                                                 |                 |                 |
| Cluster 2<br>Enrichment Score: 1.50 | Category                                                            | Term                                                                          | Count | %     | Entrez Gene IDs                                                       | PValue          | Fold Enrichment |
|                                     | INTERPRO                                                            | IPR000719:Protein kinase, catalytic domain                                    | 10    | 5.682 | 18752, 17347, 54721, 18211, 18647, 83813, 18214, 269224, 18759, 11790 | 0.019           | 2.499           |
|                                     | GOTERM_MF_DIRECT                                                    | GO:0004672~protein kinase activity                                            | 10    | 5.682 |                                                                       | 0.029           | 2.314           |
|                                     | INTERPRO                                                            | IPR011009:Protein kinase-like domain                                          | 10    | 5.682 |                                                                       | 0.029           | 2.315           |
|                                     | GOTERM_BP_DIRECT                                                    | GO:0006468~protein phosphorylation                                            | 10    | 5.682 |                                                                       | 0.040           | 2.180           |
|                                     | GOTERM_BP_DIRECT                                                    | GO:0016310~phosphorylation                                                    | 10    | 5.682 |                                                                       | 0.054           | 2.052           |
| Cluster 3<br>Enrichment Score: 1.35 | Category                                                            | Term                                                                          | Count | %     |                                                                       | Entrez Gene IDs | PValue          |
|                                     | INTERPRO                                                            | IPR020635:Tyrosine-protein kinase, catalytic domain                           | 4     | 2.273 | 54721, 18211, 83813, 18214                                            | 0.025           | 6.356           |
|                                     | SMART                                                               | SM00219:TyrKc                                                                 | 4     | 2.273 |                                                                       | 0.036           | 5.477           |
|                                     | INTERPRO                                                            | IPR008266:Tyrosine-protein kinase, active site                                | 4     | 2.273 |                                                                       | 0.041           | 5.201           |
|                                     | GOTERM_BP_DIRECT                                                    | GO:0007169~transmembrane receptor protein tyrosine kinase signaling pathway   | 4     | 2.273 |                                                                       | 0.045           | 5.023           |
|                                     | UP_KEYWORDS                                                         | Tyrosine-protein kinase                                                       | 4     | 2.273 |                                                                       | 0.052           | 4.750           |
| INTERPRO                            | IPR001245:Serine-threonine/tyrosine-protein kinase catalytic domain | 4                                                                             | 2.273 | 0.093 |                                                                       | 3.704           |                 |
| Cluster 4<br>Enrichment Score: 0.89 | Category                                                            | Term                                                                          | Count | %     | Entrez Gene IDs                                                       | PValue          | Fold Enrichment |
|                                     | INTERPRO                                                            | IPR008160:Collagen triple helix repeat                                        | 3     | 1.705 | 140792, 12842, 12837                                                  | 0.117           | 5.081           |
|                                     | UP_KEYWORDS                                                         | Collagen                                                                      | 3     | 1.705 |                                                                       | 0.131           | 4.737           |
|                                     | GOTERM_CC_DIRECT                                                    | GO:0005581~collagen trimer                                                    | 3     | 1.705 |                                                                       | 0.136           | 4.615           |
| Cluster 5<br>Enrichment Score: 0.74 | Category                                                            | Term                                                                          | Count | %     |                                                                       | Entrez Gene IDs | PValue          |
|                                     | UP_SEQ_FEATURE                                                      | domain:EGF-like 4                                                             | 3     | 1.705 | 17183, 73182, 224024                                                  | 0.075           | 6.594           |
|                                     | UP_SEQ_FEATURE                                                      | domain:EGF-like 3                                                             | 3     | 1.705 |                                                                       | 0.102           | 5.495           |
|                                     | UP_SEQ_FEATURE                                                      | domain:EGF-like 2                                                             | 3     | 1.705 |                                                                       | 0.152           | 4.317           |
|                                     | UP_SEQ_FEATURE                                                      | domain:EGF-like 1                                                             | 3     | 1.705 |                                                                       | 0.232           | 3.267           |
|                                     | INTERPRO                                                            | IPR009030:Insulin-like growth factor binding protein, N-terminal              | 3     | 1.705 |                                                                       | 0.266           | 2.970           |
|                                     | SMART                                                               | SM00181:EGF                                                                   | 3     | 1.705 |                                                                       | 0.482           | 1.838           |
| Cluster 6<br>Enrichment Score: 0.71 | Category                                                            | Term                                                                          | Count | %     |                                                                       | Entrez Gene IDs | PValue          |
|                                     | INTERPRO                                                            | IPR008271:Serine/threonine-protein kinase, active site                        | 6     | 3.409 | 18752, 17347, 18647, 269224, 18759, 11790                             | 0.116           | 2.319           |
|                                     | UP_KEYWORDS                                                         | Serine/threonine-protein kinase                                               | 6     | 3.409 |                                                                       | 0.183           | 1.988           |
|                                     | SMART                                                               | SM00220:S_TKc                                                                 | 6     | 3.409 |                                                                       | 0.251           | 1.751           |
|                                     | GOTERM_MF_DIRECT                                                    | GO:0004674~protein serine/threonine kinase activity                           | 6     | 3.409 |                                                                       | 0.265           | 1.722           |
| Cluster 7<br>Enrichment Score: 0.64 | Category                                                            | Term                                                                          | Count | %     |                                                                       | Entrez Gene IDs | PValue          |
|                                     | UP_SEQ_FEATURE                                                      | metal ion-binding site:Zinc; in inhibited form                                | 3     | 1.705 | 11504, 17388, 23794                                                   | 0.024           | 12.505          |
|                                     | UP_SEQ_FEATURE                                                      | short sequence motif:Cysteine switch                                          | 3     | 1.705 |                                                                       | 0.041           | 9.299           |
|                                     | INTERPRO                                                            | IPR024079:Metallopeptidase, catalytic domain                                  | 3     | 1.705 |                                                                       | 0.172           | 3.981           |
|                                     | GOTERM_MF_DIRECT                                                    | GO:0004222~metalloendopeptidase activity                                      | 3     | 1.705 |                                                                       | 0.262           | 2.997           |
|                                     | UP_KEYWORDS                                                         | Metalloprotease                                                               | 3     | 1.705 |                                                                       | 0.284           | 2.815           |
|                                     | GOTERM_MF_DIRECT                                                    | GO:0008237~metallopeptidase activity                                          | 3     | 1.705 |                                                                       | 0.372           | 2.304           |
|                                     | UP_KEYWORDS                                                         | Zymogen                                                                       | 3     | 1.705 |                                                                       | 0.475           | 1.890           |
|                                     | UP_KEYWORDS                                                         | Protease                                                                      | 3     | 1.705 |                                                                       | 0.913           | 0.743           |
|                                     | GOTERM_MF_DIRECT                                                    | GO:0008233~peptidase activity                                                 | 3     | 1.705 |                                                                       | 0.924           | 0.714           |
| Cluster 8<br>Enrichment Score: 0.34 | Category                                                            | Term                                                                          | Count | %     |                                                                       | Entrez Gene IDs | PValue          |
|                                     | INTERPRO                                                            | IPR001806:Small GTPase superfamily                                            | 3     | 1.705 | 19340, 19338, 19416                                                   | 0.277           | 2.882           |
|                                     | UP_KEYWORDS                                                         | Prenylation                                                                   | 3     | 1.705 |                                                                       | 0.322           | 2.564           |
|                                     | INTERPRO                                                            | IPR005225:Small GTP-binding protein domain                                    | 3     | 1.705 |                                                                       | 0.366           | 2.340           |
|                                     | GOTERM_BP_DIRECT                                                    | GO:0007264~small GTPase mediated signal transduction                          | 3     | 1.705 |                                                                       | 0.559           | 1.596           |
|                                     | UP_KEYWORDS                                                         | GTP-binding                                                                   | 3     | 1.705 |                                                                       | 0.708           | 1.213           |
| UP_SEQ_FEATURE                      | nucleotide phosphate-binding region:GTP                             | 3                                                                             | 1.705 | 0.741 |                                                                       | 1.137           |                 |

## Supplemental File 1. Continuation.

| Cluster                              | Category         | Term                                                         | Count | %      | Entrez Gene IDs                                                                                                                                                                                                                                                                                                                                                                          | PValue | Fold Enrichment |
|--------------------------------------|------------------|--------------------------------------------------------------|-------|--------|------------------------------------------------------------------------------------------------------------------------------------------------------------------------------------------------------------------------------------------------------------------------------------------------------------------------------------------------------------------------------------------|--------|-----------------|
| Cluster 9<br>Enrichment Score: 0.28  | UP_SEQ_FEATURE   | repeat:ANK 1                                                 | 3     | 1.705  | 142688, 320150, 71452                                                                                                                                                                                                                                                                                                                                                                    | 0.469  | 1.879           |
|                                      | UP_SEQ_FEATURE   | repeat:ANK 2                                                 | 3     | 1.705  |                                                                                                                                                                                                                                                                                                                                                                                          | 0.469  | 1.879           |
|                                      | UP_KEYWORDS      | ANK repeat                                                   | 3     | 1.705  |                                                                                                                                                                                                                                                                                                                                                                                          | 0.533  | 1.678           |
|                                      | INTERPRO         | IPR002110:Ankyrin repeat                                     | 3     | 1.705  |                                                                                                                                                                                                                                                                                                                                                                                          | 0.546  | 1.664           |
|                                      | INTERPRO         | IPR020683:Ankyrin repeat-containing domain                   | 3     | 1.705  |                                                                                                                                                                                                                                                                                                                                                                                          | 0.560  | 1.596           |
|                                      | SMART            | SM00248:ANK                                                  | 3     | 1.705  |                                                                                                                                                                                                                                                                                                                                                                                          | 0.600  | 1.479           |
| Cluster 10<br>Enrichment Score: 0.21 | UP_KEYWORDS      | mRNA splicing                                                | 3     | 1.705  | 67959, 67684, 75956                                                                                                                                                                                                                                                                                                                                                                      | 0.533  | 1.678           |
|                                      | GOTERM_BP_DIRECT | GO:0008380~RNA splicing                                      | 3     | 1.705  |                                                                                                                                                                                                                                                                                                                                                                                          | 0.571  | 1.563           |
|                                      | UP_KEYWORDS      | mRNA processing                                              | 3     | 1.705  |                                                                                                                                                                                                                                                                                                                                                                                          | 0.666  | 1.311           |
|                                      | GOTERM_BP_DIRECT | GO:0006397~mRNA processing                                   | 3     | 1.705  |                                                                                                                                                                                                                                                                                                                                                                                          | 0.726  | 1.170           |
| Cluster 11<br>Enrichment Score: 0.19 | UP_KEYWORDS      | Homeobox                                                     | 3     | 1.705  | 21410, 384452, 210719                                                                                                                                                                                                                                                                                                                                                                    | 0.616  | 1.438           |
|                                      | INTERPRO         | IPR001356:Homeodomain                                        | 3     | 1.705  |                                                                                                                                                                                                                                                                                                                                                                                          | 0.621  | 1.425           |
|                                      | SMART            | SM00389:HOX                                                  | 3     | 1.705  |                                                                                                                                                                                                                                                                                                                                                                                          | 0.691  | 1.251           |
| Cluster 12<br>Enrichment Score: 0.18 | UP_KEYWORDS      | Transmembrane helix                                          | 51    | 28.977 | 70310, 11539, 233863, 224024, 217219, 16402, 72055, 207683, 17388, 72555, 320150, 12723, 14615, 243168, 100043125, 54420, 380712, 12223, 232664, 12794, 18211, 170813, 18214, 12558, 20969, 17355, 218271, 50918, 60504, 11552, 381924, 228368, 75571, 258595, 20452, 13642, 16399, 14764, 18667, 241116, 382551, 98170, 77254, 12737, 54445, 15937, 73182, 140792, 239845, 20392, 14362 | 0.621  | 0.986           |
|                                      | UP_KEYWORDS      | Transmembrane                                                | 51    | 28.977 |                                                                                                                                                                                                                                                                                                                                                                                          | 0.629  | 0.984           |
|                                      | GOTERM_CC_DIRECT | GO:0016021~integral component of membrane                    | 51    | 28.977 |                                                                                                                                                                                                                                                                                                                                                                                          | 0.752  | 0.947           |
| Cluster 13<br>Enrichment Score: 0.13 | INTERPRO         | IPR003598:immunoglobulin subtype 2                           | 3     | 1.705  | 98733, 207683, 11790                                                                                                                                                                                                                                                                                                                                                                     | 0.560  | 1.596           |
|                                      | SMART            | SM00408:IGc2                                                 | 3     | 1.705  | 98733, 207683, 11790                                                                                                                                                                                                                                                                                                                                                                     | 0.640  | 1.375           |
|                                      | INTERPRO         | IPR003599:immunoglobulin subtype                             | 3     | 1.705  | 98733, 207683, 11790                                                                                                                                                                                                                                                                                                                                                                     | 0.912  | 0.745           |
|                                      | SMART            | SM00409:IG                                                   | 3     | 1.705  | 98733, 207683, 11790                                                                                                                                                                                                                                                                                                                                                                     | 0.949  | 0.642           |
|                                      | INTERPRO         | IPR013087:Zinc finger C2H2-type/integrase DNA-binding domain | 4     | 2.273  | 56525, 93691, 230761, 75580                                                                                                                                                                                                                                                                                                                                                              | 0.883  | 0.790           |
| Cluster 14<br>Enrichment Score: 0.04 | INTERPRO         | IPR015880:Zinc finger, C2H2-like                             | 4     | 2.273  | 56525, 93691, 230761, 75580                                                                                                                                                                                                                                                                                                                                                              | 0.907  | 0.743           |
|                                      | INTERPRO         | IPR007087:Zinc finger, C2H2                                  | 4     | 2.273  | 56525, 93691, 230761, 75580                                                                                                                                                                                                                                                                                                                                                              | 0.925  | 0.704           |
|                                      | SMART            | SM00355:ZnF_C2H2                                             | 4     | 2.273  | 56525, 93691, 230761, 75580                                                                                                                                                                                                                                                                                                                                                              | 0.952  | 0.640           |
|                                      | SMART            | SM00355:ZnF_C2H2                                             | 4     | 2.273  | 56525, 93691, 230761, 75580                                                                                                                                                                                                                                                                                                                                                              | 0.952  | 0.640           |

## Supplemental File 2.

### Pathway Enrichment Analysis of Downregulated Genes

Functional enrichment analysis was performed through DAVID using the highest stringency. Depicted below are the 11 functional clusters extracted from the statistically significant downregulated gene list.

| Cluster                               | Category         | Term                                                                | Count | %    | Genes                                                                             | PValue | Fold Enrichment |
|---------------------------------------|------------------|---------------------------------------------------------------------|-------|------|-----------------------------------------------------------------------------------|--------|-----------------|
| Cluster 1<br>Enrichment Score: 1.55   | INTERPRO         | IPR013087:Zinc finger C2H2-type/integrase DNA-binding domain        | 10    | 6.67 | 110593, 112415, 56490, 328274, 100233208, 100041433, 70081, 433791, 433520, 17764 | 0.019  | 2.487           |
|                                       | INTERPRO         | IPR015880:Zinc finger, C2H2-like                                    | 10    | 6.67 |                                                                                   | 0.027  | 2.340           |
|                                       | SMART            | SM00355:ZnF_C2H2                                                    | 10    | 6.67 |                                                                                   | 0.045  | 2.089           |
|                                       |                  |                                                                     |       |      |                                                                                   |        |                 |
| Cluster 2<br>Enrichment Score: 0.90   | GOTERM_BP_DIRECT | GO:0018108~peptidyl-tyrosine phosphorylation                        | 3     | 2.00 | 14254, 13838, 14360                                                               | 0.069  | 6.897           |
|                                       | INTERPRO         | IPR020635:Tyrosine-protein kinase, catalytic domain                 | 3     | 2.00 |                                                                                   | 0.088  | 6.006           |
|                                       | SMART            | SM00219:TyrKc                                                       | 3     | 2.00 |                                                                                   | 0.105  | 5.363           |
|                                       | INTERPRO         | IPR008266:Tyrosine-protein kinase, active site                      | 3     | 2.00 |                                                                                   | 0.123  | 4.914           |
|                                       | UP_KEYWORDS      | Tyrosine-protein kinase                                             | 3     | 2.00 |                                                                                   | 0.147  | 4.395           |
|                                       | GOTERM_MF_DIRECT | GO:0004713~protein tyrosine kinase activity                         | 3     | 2.00 |                                                                                   | 0.197  | 3.635           |
|                                       | INTERPRO         | IPR001245:Serine-threonine/tyrosine-protein kinase catalytic domain | 3     | 2.00 |                                                                                   | 0.209  | 3.500           |
| Cluster 3<br>Enrichment Score: 0.59   | UP_SEQ_FEATURE   | calcium-binding region:2                                            | 3     | 2.00 | 18570, 170638, 13518                                                              | 0.160  | 4.158           |
|                                       | UP_SEQ_FEATURE   | calcium-binding region:1                                            | 3     | 2.00 |                                                                                   | 0.187  | 3.762           |
|                                       | SMART            | SM00054:EFh                                                         | 3     | 2.00 |                                                                                   | 0.260  | 2.996           |
|                                       | INTERPRO         | IPR018247:EF-Hand 1, calcium-binding site                           | 3     | 2.00 |                                                                                   | 0.290  | 2.780           |
|                                       | UP_SEQ_FEATURE   | domain:EF-hand 2                                                    | 3     | 2.00 |                                                                                   | 0.296  | 2.740           |
|                                       | UP_SEQ_FEATURE   | domain:EF-hand 1                                                    | 3     | 2.00 |                                                                                   | 0.298  | 2.724           |
|                                       | INTERPRO         | IPR002048:EF-hand domain                                            | 3     | 2.00 |                                                                                   | 0.397  | 2.181           |
| Cluster 4<br>Enrichment Score: 0.56   | Category         | Term                                                                | Count | %    | 14254, 13838, 27263, 24013, 14360, 22241                                          | PValue | Fold Enrichment |
|                                       | INTERPRO         | IPR000719:Protein kinase, catalytic domain                          | 6     | 4.00 |                                                                                   | 0.208  | 1.889           |
|                                       | GOTERM_MF_DIRECT | GO:0004672~protein kinase activity                                  | 6     | 4.00 |                                                                                   | 0.290  | 1.657           |
|                                       | GOTERM_BP_DIRECT | GO:0006468~protein phosphorylation                                  | 6     | 4.00 |                                                                                   | 0.336  | 1.557           |
| Cluster 5<br>Enrichment Score: 0.50   | Category         | Term                                                                | Count | %    | 67434, 329251, 142687                                                             | PValue | Fold Enrichment |
|                                       | UP_SEQ_FEATURE   | repeat:ANK 5                                                        | 3     | 2.00 |                                                                                   | 0.147  | 4.389           |
|                                       | UP_SEQ_FEATURE   | repeat:ANK 4                                                        | 3     | 2.00 |                                                                                   | 0.190  | 3.732           |
|                                       | UP_SEQ_FEATURE   | repeat:ANK 3                                                        | 3     | 2.00 |                                                                                   | 0.266  | 2.963           |
|                                       | UP_SEQ_FEATURE   | repeat:ANK 1                                                        | 3     | 2.00 |                                                                                   | 0.342  | 2.456           |
|                                       | UP_SEQ_FEATURE   | repeat:ANK 2                                                        | 3     | 2.00 |                                                                                   | 0.342  | 2.456           |
|                                       | INTERPRO         | IPR002110:Ankyrin repeat                                            | 3     | 2.00 |                                                                                   | 0.416  | 2.097           |
|                                       | UP_KEYWORDS      | ANK repeat                                                          | 3     | 2.00 |                                                                                   | 0.423  | 2.069           |
|                                       | INTERPRO         | IPR020683:Ankyrin repeat-containing domain                          | 3     | 2.00 |                                                                                   | 0.437  | 2.010           |
|                                       | SMART            | SM00248:ANK                                                         | 3     | 2.00 |                                                                                   | 0.455  | 1.931           |
| Cluster 6<br>Enrichment Score: 0.50   | Category         | Term                                                                | Count | %    | 72685, 16549, 71844                                                               | PValue | Fold Enrichment |
|                                       | UP_SEQ_FEATURE   | repeat:3                                                            | 3     | 2.00 |                                                                                   | 0.242  | 3.160           |
|                                       | UP_SEQ_FEATURE   | repeat:1                                                            | 3     | 2.00 |                                                                                   | 0.358  | 2.370           |
|                                       | UP_SEQ_FEATURE   | repeat:2                                                            | 3     | 2.00 |                                                                                   | 0.365  | 2.335           |
| Cluster 7<br>Enrichment Score: 0.44   | Category         | Term                                                                | Count | %    | 56490, 20747, 75785                                                               | PValue | Fold Enrichment |
|                                       | UP_SEQ_FEATURE   | domain:BTB                                                          | 3     | 2.00 |                                                                                   | 0.240  | 3.181           |
|                                       | INTERPRO         | IPR000210:BTB/POZ-like                                              | 3     | 2.00 |                                                                                   | 0.395  | 2.191           |
|                                       | INTERPRO         | IPR011333:BTB/POZ fold                                              | 3     | 2.00 |                                                                                   | 0.416  | 2.097           |
|                                       | SMART            | SM00225:BTB                                                         | 3     | 2.00 | 0.439                                                                             | 1.993  |                 |
| Cluster 8<br>Enrichment Score: 0.33   | Category         | Term                                                                | Count | %    | 74048, 14254, 12519, 106347, 67374                                                | PValue | Fold Enrichment |
|                                       | UP_KEYWORDS      | Immunoglobulin domain                                               | 5     | 3.33 |                                                                                   | 0.326  | 1.721           |
|                                       | INTERPRO         | IPR003599:immunoglobulin subtype                                    | 5     | 3.33 |                                                                                   | 0.391  | 1.565           |
|                                       | SMART            | SM00409:Ig                                                          | 5     | 3.33 |                                                                                   | 0.473  | 1.398           |
|                                       | INTERPRO         | IPR007110:Immunoglobulin-like domain                                | 5     | 3.33 | 0.820                                                                             | 0.881  |                 |
| Cluster 9<br>Enrichment Score: 0.06   | Category         | Term                                                                | Count | %    | 215351, 214523, 73382                                                             | PValue | Fold Enrichment |
|                                       | UP_KEYWORDS      | Protease                                                            | 3     | 2.00 |                                                                                   | 0.839  | 0.916           |
|                                       | GOTERM_MF_DIRECT | GO:0008233~peptidase activity                                       | 3     | 2.00 |                                                                                   | 0.868  | 0.852           |
|                                       | GOTERM_BP_DIRECT | GO:0006508~proteolysis                                              | 3     | 2.00 |                                                                                   | 0.902  | 0.770           |
| Cluster 10<br>Enrichment Score: 0.05  | Category         | Term                                                                | Count | %    | 15424, 107823, 16549, 56490, 70461, 74042, 20182, 17764, 17135                    | PValue | Fold Enrichment |
|                                       | UP_KEYWORDS      | Transcription regulation                                            | 9     | 6.00 |                                                                                   | 0.854  | 0.828           |
|                                       | UP_KEYWORDS      | Transcription                                                       | 9     | 6.00 |                                                                                   | 0.877  | 0.801           |
|                                       | GOTERM_BP_DIRECT | GO:0006351~transcription, DNA-templated                             | 9     | 6.00 |                                                                                   | 0.941  | 0.713           |
| Cluster 11<br>Enrichment Score: 0.002 | Category         | Term                                                                | Count | %    | 259111, 258713, 258604                                                            | PValue | Fold Enrichment |
|                                       | UP_KEYWORDS      | Olfaction                                                           | 3     | 2.00 |                                                                                   | 0.993  | 0.429           |
|                                       | INTERPRO         | IPR000725:Olfactory receptor                                        | 3     | 2.00 |                                                                                   | 0.994  | 0.423           |
|                                       | KEGG_PATHWAY     | mmu04740:Olfactory transduction                                     | 3     | 2.00 |                                                                                   | 0.996  | 0.412           |
|                                       | GOTERM_BP_DIRECT | GO:0007608~sensory perception of smell                              | 3     | 2.00 |                                                                                   | 0.996  | 0.392           |
|                                       | GOTERM_MF_DIRECT | GO:0004984~olfactory receptor activity                              | 3     | 2.00 |                                                                                   | 0.997  | 0.381           |

**Supplemental File 3.**

Functional terms not clustered during pathway enrichment analysis of Upregulated genes.

| Category         | Term                                                            | Count | %     | Genes                                                                                                                                                                                                                                                                                                                                                                                                                                                                                                                                                                                                          | PValue | Fold Enrichment |
|------------------|-----------------------------------------------------------------|-------|-------|----------------------------------------------------------------------------------------------------------------------------------------------------------------------------------------------------------------------------------------------------------------------------------------------------------------------------------------------------------------------------------------------------------------------------------------------------------------------------------------------------------------------------------------------------------------------------------------------------------------|--------|-----------------|
| GOTERM_MF_DIRECT | GO:0005515~protein binding                                      | 55    | 31.25 | 17347, 20437, 72836, 11539, 67254, 16890, 16402, 140917, 320150, 19340, 14615, 54420, 15957, 212706, 21770, 384783, 432611, 13385, 27418, 18211, 83409, 170813, 11766, 12558, 56390, 76742, 21410, 53310, 17826, 17192, 12703, 18667, 76022, 382551, 244059, 12394, 13435, 244058, 12842, 56376, 14260, 12737, 16882, 18759, 210719, 20466, 19338, 15937, 18752, 67220, 11504, 71994, 20392, 15519, 22628                                                                                                                                                                                                      | 0.0001 | 1.651           |
| UP_KEYWORDS      | Phosphoprotein                                                  | 82    | 46.59 | 17313, 17347, 80288, 68166, 75956, 20437, 233863, 224024, 13998, 16890, 94232, 14432, 18647, 269224, 217219, 16402, 72055, 12723, 76813, 224742, 243168, 230793, 54721, 15957, 212706, 18739, 13807, 12349, 232664, 384783, 13385, 18211, 214459, 98733, 83813, 18214, 20969, 56390, 17355, 75580, 67684, 76742, 11790, 13642, 21410, 114601, 53310, 17826, 17192, 195434, 18667, 14764, 67959, 12350, 76022, 13435, 244059, 12394, 208177, 329739, 77254, 12842, 140486, 56376, 14260, 16592, 16882, 18759, 71452, 105203, 54445, 20466, 15937, 67220, 53414, 18752, 73182, 17974, 76156, 21991, 22628, 15519 | 0.0001 | 1.445           |
| GOTERM_CC_DIRECT | GO:0016020~membrane                                             | 77    | 43.75 | 68166, 70310, 11539, 233863, 224024, 16890, 14432, 18647, 217219, 16402, 17388, 207683, 72055, 72555, 320150, 12723, 224742, 19340, 14615, 19416, 54721, 54420, 380712, 212706, 18739, 13807, 12223, 12349, 232664, 13385, 12794, 18211, 83409, 214459, 83813, 18214, 170813, 11766, 12558, 20969, 252903, 218271, 50918, 60504, 76742, 381924, 228368, 75571, 13642, 20452, 276919, 114601, 16399, 14764, 241116, 382551, 98170, 244058, 77254, 208177, 56376, 14260, 12737, 18759, 54445, 15937, 19338, 67220, 53414, 18752, 140792, 73182, 239845, 20392, 22628, 15519, 14362                               | 0.0002 | 1.405           |
| UP_SEQ_FEATURE   | compositionally biased region:Glu-rich                          | 10    | 5.68  | 17192, 73884, 76022, 241116, 67684, 73569, 232664, 114601, 224742, 432611                                                                                                                                                                                                                                                                                                                                                                                                                                                                                                                                      | 0.0003 | 4.614           |
| GOTERM_CC_DIRECT | GO:0014069~postsynaptic density                                 | 9     | 5.11  | 18752, 14432, 56376, 71994, 17974, 11539, 13385, 12794, 53310                                                                                                                                                                                                                                                                                                                                                                                                                                                                                                                                                  | 0.0006 | 4.808           |
| GOTERM_CC_DIRECT | GO:0045202~synapse                                              | 13    | 7.39  | 56376, 11539, 12794, 13385, 53310, 18752, 239845, 14432, 16402, 12558, 320150, 72555, 17974                                                                                                                                                                                                                                                                                                                                                                                                                                                                                                                    | 0.0006 | 3.287           |
| UP_KEYWORDS      | Methylation                                                     | 18    | 10.23 | 230793, 80288, 18739, 75956, 11790, 13642, 384783, 19338, 53414, 406220, 71994, 207683, 21991, 68524, 13435, 12394, 19340, 19416                                                                                                                                                                                                                                                                                                                                                                                                                                                                               | 0.0008 | 2.516           |
| UP_KEYWORDS      | Alternative splicing                                            | 54    | 30.68 | 17347, 80288, 68166, 75956, 233863, 13998, 16890, 18647, 217219, 140917, 72055, 72555, 320150, 76813, 233001, 243168, 380712, 232664, 432611, 56812, 13385, 213484, 98733, 83813, 214459, 20969, 218271, 105428, 67684, 76742, 75571, 11790, 21410, 114601, 17826, 17192, 67959, 12394, 244058, 353282, 208177, 77254, 12842, 56376, 14260, 16882, 71452, 54445, 20466, 17183, 73182, 239170, 76156, 20392                                                                                                                                                                                                     | 0.0009 | 1.516           |
| GOTERM_CC_DIRECT | GO:0005925~focal adhesion                                       | 11    | 6.25  | 208177, 18214, 16402, 71994, 12558, 20969, 13642, 22628, 224024, 16399, 14362                                                                                                                                                                                                                                                                                                                                                                                                                                                                                                                                  | 0.0010 | 3.592           |
| GOTERM_CC_DIRECT | GO:0032281~AMPA glutamate receptor complex                      | 4     | 2.27  | 72555, 13385, 12794, 53310                                                                                                                                                                                                                                                                                                                                                                                                                                                                                                                                                                                     | 0.0016 | 17.023          |
| GOTERM_CC_DIRECT | GO:0030659~cytoplasmic vesicle membrane                         | 6     | 3.41  | 68166, 212706, 11766, 320150, 252903, 22628                                                                                                                                                                                                                                                                                                                                                                                                                                                                                                                                                                    | 0.0025 | 6.384           |
| GOTERM_BP_DIRECT | GO:0042220~response to cocaine                                  | 4     | 2.27  | 18667, 15519, 13435, 13385                                                                                                                                                                                                                                                                                                                                                                                                                                                                                                                                                                                     | 0.0033 | 13.218          |
| UP_KEYWORDS      | Cell junction                                                   | 13    | 7.39  | 56376, 54420, 14260, 12737, 12794, 13385, 18752, 239845, 14432, 16402, 320150, 72555, 14615                                                                                                                                                                                                                                                                                                                                                                                                                                                                                                                    | 0.0039 | 2.639           |
| GOTERM_CC_DIRECT | GO:0030054~cell junction                                        | 14    | 7.95  | 56376, 54420, 14260, 12737, 12794, 13385, 18752, 239845, 14432, 67959, 16402, 72555, 320150, 14615                                                                                                                                                                                                                                                                                                                                                                                                                                                                                                             | 0.0041 | 2.489           |
| GOTERM_CC_DIRECT | GO:0031410~cytoplasmic vesicle                                  | 13    | 7.39  | 212706, 68166, 54445, 12703, 94232, 18211, 214459, 11504, 16402, 11766, 320150, 252903, 109685                                                                                                                                                                                                                                                                                                                                                                                                                                                                                                                 | 0.0047 | 2.569           |
| GOTERM_CC_DIRECT | GO:0016323~basolateral plasma membrane                          | 7     | 3.98  | 54420, 12558, 12349, 11539, 15519, 13385, 53310                                                                                                                                                                                                                                                                                                                                                                                                                                                                                                                                                                | 0.0052 | 4.403           |
| GOTERM_MF_DIRECT | GO:0019903~protein phosphatase binding                          | 5     | 2.84  | 12558, 15519, 384783, 13385, 53310                                                                                                                                                                                                                                                                                                                                                                                                                                                                                                                                                                             | 0.0056 | 6.981           |
| GOTERM_CC_DIRECT | GO:0005737~cytoplasm                                            | 68    | 38.64 | 17347, 227290, 68166, 20437, 70827, 13998, 16890, 94232, 14432, 18647, 269224, 16402, 140917, 320150, 233001, 224742, 19416, 54721, 15957, 18739, 13807, 12349, 384783, 13385, 432611, 66089, 27418, 18211, 98733, 83813, 214459, 170813, 12558, 20969, 76742, 276919, 105663, 18767, 53310, 17826, 17192, 12703, 18667, 12350, 68524, 12394, 13435, 208177, 12842, 140486, 56376, 14260, 16592, 12737, 18759, 105203, 20466, 67220, 53414, 18752, 11504, 71994, 76156, 17974, 20392, 15519, 22628, 73047                                                                                                      | 0.0059 | 1.309           |
| GOTERM_CC_DIRECT | GO:0043197~dendritic spine                                      | 6     | 3.41  | 18667, 140486, 71994, 11539, 13385, 12794                                                                                                                                                                                                                                                                                                                                                                                                                                                                                                                                                                      | 0.0061 | 5.176           |
| GOTERM_CC_DIRECT | GO:0031012~extracellular matrix                                 | 8     | 4.55  | 218271, 17313, 12842, 11504, 17388, 23794, 15519, 12837                                                                                                                                                                                                                                                                                                                                                                                                                                                                                                                                                        | 0.0083 | 3.474           |
| UP_SEQ_FEATURE   | topological domain:Extracellular                                | 30    | 17.05 | 60504, 11552, 70310, 381924, 11539, 13642, 224024, 16399, 14764, 382551, 16402, 217219, 17388, 207683, 98170, 14615, 77254, 54420, 12737, 12223, 15937, 140792, 239845, 18211, 170813, 18214, 12558, 20969, 20392, 14362                                                                                                                                                                                                                                                                                                                                                                                       | 0.0092 | 1.608           |
| INTERPRO         | IPR017441:Protein kinase, ATP binding site                      | 9     | 5.11  | 18752, 17347, 54721, 18211, 18647, 83813, 269224, 18759, 11790                                                                                                                                                                                                                                                                                                                                                                                                                                                                                                                                                 | 0.0116 | 2.940           |
| UP_SEQ_FEATURE   | active site:Proton acceptor                                     | 13    | 7.39  | 243168, 54721, 17347, 13807, 11790, 18759, 18752, 18211, 18647, 83813, 269224, 18214, 21991                                                                                                                                                                                                                                                                                                                                                                                                                                                                                                                    | 0.0143 | 2.213           |
| GOTERM_BP_DIRECT | GO:0046777~protein autophosphorylation                          | 6     | 3.41  | 18752, 17347, 18211, 83813, 18214, 269224                                                                                                                                                                                                                                                                                                                                                                                                                                                                                                                                                                      | 0.0152 | 4.117           |
| GOTERM_MF_DIRECT | GO:0004713~protein tyrosine kinase activity                     | 5     | 2.84  | 54721, 18211, 83813, 18214, 15519                                                                                                                                                                                                                                                                                                                                                                                                                                                                                                                                                                              | 0.0168 | 5.077           |
| UP_SEQ_FEATURE   | metal ion-binding site:Zinc; catalytic                          | 5     | 2.84  | 12350, 11504, 17388, 23794, 12349                                                                                                                                                                                                                                                                                                                                                                                                                                                                                                                                                                              | 0.0168 | 5.079           |
| UP_KEYWORDS      | Synapse                                                         | 8     | 4.55  | 18752, 14432, 239845, 56376, 72555, 320150, 13385, 12794                                                                                                                                                                                                                                                                                                                                                                                                                                                                                                                                                       | 0.0173 | 3.007           |
| GOTERM_BP_DIRECT | GO:0016477~cell migration                                       | 6     | 3.41  | 54721, 12558, 17974, 20969, 18759, 13642                                                                                                                                                                                                                                                                                                                                                                                                                                                                                                                                                                       | 0.0180 | 3.945           |
| GOTERM_BP_DIRECT | GO:0035987~endodermal cell differentiation                      | 3     | 1.70  | 16402, 17388, 12837                                                                                                                                                                                                                                                                                                                                                                                                                                                                                                                                                                                            | 0.0192 | 13.952          |
| UP_SEQ_FEATURE   | compositionally biased region:Poly-Ser                          | 9     | 5.11  | 12703, 239845, 18739, 75571, 30946, 11790, 384783, 17355, 56812                                                                                                                                                                                                                                                                                                                                                                                                                                                                                                                                                | 0.0194 | 2.673           |
| UP_SEQ_FEATURE   | binding site:ATP                                                | 11    | 6.25  | 18752, 17347, 54721, 18211, 18647, 83813, 18214, 269224, 16882, 18759, 11790                                                                                                                                                                                                                                                                                                                                                                                                                                                                                                                                   | 0.0223 | 2.281           |
| GOTERM_BP_DIRECT | GO:0010976~positive regulation of neuron projection development | 5     | 2.84  | 18211, 21770, 11504, 18759, 244058                                                                                                                                                                                                                                                                                                                                                                                                                                                                                                                                                                             | 0.0240 | 4.550           |
| UP_SEQ_FEATURE   | compositionally biased region:Cys-rich                          | 5     | 2.84  | 73884, 70310, 11504, 23794, 20392                                                                                                                                                                                                                                                                                                                                                                                                                                                                                                                                                                              | 0.0253 | 4.477           |
| UP_KEYWORDS      | Palmitate                                                       | 7     | 3.98  | 14432, 18667, 11552, 70310, 320150, 11539, 13385                                                                                                                                                                                                                                                                                                                                                                                                                                                                                                                                                               | 0.0262 | 3.090           |
| GOTERM_CC_DIRECT | GO:0097060~synaptic membrane                                    | 3     | 1.70  | 18752, 13807, 13385                                                                                                                                                                                                                                                                                                                                                                                                                                                                                                                                                                                            | 0.0271 | 11.607          |
| UP_KEYWORDS      | Cytoplasmic vesicle                                             | 9     | 5.11  | 12703, 94232, 214459, 68166, 212706, 11766, 320150, 252903, 54445                                                                                                                                                                                                                                                                                                                                                                                                                                                                                                                                              | 0.0296 | 2.470           |
| GOTERM_CC_DIRECT | GO:0045211~postsynaptic membrane                                | 6     | 3.41  | 239845, 56376, 11539, 13385, 12794, 53310                                                                                                                                                                                                                                                                                                                                                                                                                                                                                                                                                                      | 0.0300 | 3.451           |
| GOTERM_MF_DIRECT | GO:0042802~identical protein binding                            | 11    | 6.25  | 12842, 94232, 54420, 67959, 20437, 12737, 320150, 56390, 15519, 13435, 16399                                                                                                                                                                                                                                                                                                                                                                                                                                                                                                                                   | 0.0305 | 2.162           |
| KEGG_PATHWAY     | mmu04910:insulin signaling pathway                              | 5     | 2.84  | 17347, 12703, 16890, 18759, 384783                                                                                                                                                                                                                                                                                                                                                                                                                                                                                                                                                                             | 0.0314 | 4.115           |
| UP_SEQ_FEATURE   | splice variant                                                  | 50    | 28.41 | 17347, 80288, 68166, 75956, 233863, 13998, 217219, 140917, 72055, 320150, 76813, 233001, 243168, 380712, 232664, 432611, 56812, 13385, 213484, 83813, 214459, 20969, 218271, 105428, 67684, 76742, 75571, 11790, 21410, 114601, 17192, 67959, 12394, 13435, 244058, 353282, 208177, 77254, 12842, 56376, 14260, 16882, 71452, 54445, 20466, 17183, 73182, 239170, 76156, 20392                                                                                                                                                                                                                                 | 0.0329 | 1.288           |
| GOTERM_BP_DIRECT | GO:0006605~protein targeting                                    | 3     | 1.70  | 252903, 22628, 70827                                                                                                                                                                                                                                                                                                                                                                                                                                                                                                                                                                                           | 0.0363 | 9.913           |
| GOTERM_CC_DIRECT | GO:0005829~cytosol                                              | 22    | 12.50 | 56376, 76742, 68166, 20437, 12349, 18759, 384783, 276919, 56812, 27418, 18752, 16890, 12703, 18667, 94232, 12350, 83813, 18647, 21991, 22628, 15519, 73047                                                                                                                                                                                                                                                                                                                                                                                                                                                     | 0.0364 | 1.574           |
| GOTERM_BP_DIRECT | GO:0030199~collagen fibril organization                         | 3     | 1.70  | 12842, 18214, 210719                                                                                                                                                                                                                                                                                                                                                                                                                                                                                                                                                                                           | 0.0380 | 9.659           |

## Supplemental File 3. Continuation.

| Category         | Term                                                                                   | Count | %     | Genes                                                                                                                                                                                                                                                                                                                                                                                                                                                                                                                                                                               | PValue | Fold Enrichment |
|------------------|----------------------------------------------------------------------------------------|-------|-------|-------------------------------------------------------------------------------------------------------------------------------------------------------------------------------------------------------------------------------------------------------------------------------------------------------------------------------------------------------------------------------------------------------------------------------------------------------------------------------------------------------------------------------------------------------------------------------------|--------|-----------------|
| GOTERM_CC_DIRECT | GO:0030425~dendrite                                                                    | 9     | 5.11  | 18752, 18211, 18667, 140486, 71994, 11539, 20392, 13385, 12794                                                                                                                                                                                                                                                                                                                                                                                                                                                                                                                      | 0.0381 | 2.345           |
| UP_KEYWORDS      | Kinase                                                                                 | 11    | 6.25  | 18752, 17347, 54721, 18211, 18647, 83813, 18214, 269224, 18759, 11790, 73047                                                                                                                                                                                                                                                                                                                                                                                                                                                                                                        | 0.0381 | 2.088           |
| UP_KEYWORDS      | Membrane                                                                               | 77    | 43.75 | 68166, 70310, 11539, 233863, 224024, 16890, 14432, 18647, 217219, 16402, 17388, 207683, 72055, 72555, 320150, 12723, 19340, 14615, 19416, 243168, 100043125, 54420, 380712, 212706, 18739, 13807, 12223, 12349, 232664, 13385, 12794, 18211, 83409, 214459, 83813, 18214, 170813, 11766, 12558, 20969, 252903, 17355, 218271, 50918, 60504, 11552, 76742, 381924, 258595, 228368, 75571, 13642, 20452, 16399, 18667, 14764, 241116, 382551, 98170, 244058, 77254, 208177, 56376, 14260, 12737, 18759, 54445, 15937, 19338, 67220, 18752, 73182, 140792, 239845, 20392, 15519, 14362 | 0.0384 | 1.284           |
| GOTERM_CC_DIRECT | GO:0005886~plasma membrane                                                             | 49    | 27.84 | 50918, 11552, 68166, 70310, 20437, 258595, 11539, 13642, 70827, 53310, 16890, 18667, 14764, 14432, 241116, 18647, 382551, 16402, 207683, 72555, 320150, 12723, 19340, 244058, 14615, 19416, 208177, 54420, 56376, 14260, 12737, 13807, 12223, 12349, 18759, 384783, 13385, 12794, 67220, 18752, 73182, 239845, 18211, 214459, 18214, 12558, 20392, 15519, 14362                                                                                                                                                                                                                     | 0.0384 | 1.284           |
| GOTERM_BP_DIRECT | GO:0007155~cell adhesion                                                               | 9     | 5.11  | 53414, 16402, 381924, 207683, 12558, 13642, 224024, 16399, 12837                                                                                                                                                                                                                                                                                                                                                                                                                                                                                                                    | 0.0391 | 2.330           |
| KEGG_PATHWAY     | mmu04512:ECM-receptor interaction                                                      | 4     | 2.27  | 12842, 16402, 20969, 16399                                                                                                                                                                                                                                                                                                                                                                                                                                                                                                                                                          | 0.0391 | 5.237           |
| UP_KEYWORDS      | Cell membrane                                                                          | 38    | 21.59 | 11552, 68166, 258595, 11539, 16890, 14432, 14764, 241116, 18647, 382551, 207683, 72555, 320150, 12723, 19340, 244058, 14615, 19416, 54420, 56376, 14260, 12737, 13807, 12223, 12349, 13385, 12794, 18752, 67220, 73182, 239845, 18211, 214459, 18214, 12558, 20392, 15519, 14362                                                                                                                                                                                                                                                                                                    | 0.0393 | 1.357           |
| KEGG_PATHWAY     | mmu04390:Hippo signaling pathway                                                       | 5     | 2.84  | 18759, 22628, 13385, 14362, 53310                                                                                                                                                                                                                                                                                                                                                                                                                                                                                                                                                   | 0.0398 | 3.815           |
| UP_SEQ_FEATURE   | topological domain:Cytoplasmic                                                         | 33    | 18.75 | 218271, 60504, 11552, 70310, 381924, 11539, 13642, 20452, 224024, 16399, 14764, 382551, 16402, 217219, 207683, 17388, 320150, 12723, 98170, 14615, 77254, 54420, 12737, 12223, 15937, 140792, 239845, 170813, 18214, 12558, 20969, 20392, 14362                                                                                                                                                                                                                                                                                                                                     | 0.0427 | 1.385           |
| UP_KEYWORDS      | Calcium                                                                                | 12    | 6.82  | 17313, 18752, 140792, 12842, 70310, 16402, 18739, 381924, 11504, 17388, 12558, 16399                                                                                                                                                                                                                                                                                                                                                                                                                                                                                                | 0.0442 | 1.947           |
| UP_KEYWORDS      | Cytoplasm                                                                              | 43    | 24.43 | 17347, 76742, 68166, 20437, 105663, 13998, 17826, 16890, 18667, 94232, 12350, 18647, 269224, 140917, 68524, 13435, 233001, 224742, 19416, 208177, 140486, 15957, 56376, 18739, 14260, 16592, 13807, 18759, 12349, 384783, 432611, 27418, 18752, 53414, 67220, 98733, 83813, 214459, 17974, 20392, 15519, 22628, 73047                                                                                                                                                                                                                                                               | 0.0442 | 1.310           |
| GOTERM_BP_DIRECT | GO:0032355~response to estradiol                                                       | 4     | 2.27  | 17192, 12842, 17388, 13435                                                                                                                                                                                                                                                                                                                                                                                                                                                                                                                                                          | 0.0461 | 4.973           |
| GOTERM_CC_DIRECT | GO:0043005~neuron projection                                                           | 8     | 4.55  | 18752, 14764, 18667, 56376, 13807, 15519, 244058, 14362                                                                                                                                                                                                                                                                                                                                                                                                                                                                                                                             | 0.0463 | 2.432           |
| GOTERM_MF_DIRECT | GO:0016301~kinase activity                                                             | 11    | 6.25  | 18752, 17347, 54721, 18211, 18647, 83813, 18214, 269224, 18759, 11790, 73047                                                                                                                                                                                                                                                                                                                                                                                                                                                                                                        | 0.0469 | 2.005           |
| GOTERM_CC_DIRECT | GO:0045171~intercellular bridge                                                        | 3     | 1.70  | 227290, 18759, 20466                                                                                                                                                                                                                                                                                                                                                                                                                                                                                                                                                                | 0.0479 | 8.512           |
| GOTERM_CC_DIRECT | GO:0042995~cell projection                                                             | 11    | 6.25  | 27418, 18752, 53414, 14432, 241116, 140486, 72555, 20392, 13385, 12794, 432611                                                                                                                                                                                                                                                                                                                                                                                                                                                                                                      | 0.0518 | 1.973           |
| KEGG_PATHWAY     | mmu05202:Transcriptional misregulation in cancer                                       | 5     | 2.84  | 18211, 18647, 17355, 12394, 20466                                                                                                                                                                                                                                                                                                                                                                                                                                                                                                                                                   | 0.0531 | 3.471           |
| UP_KEYWORDS      | Golgi apparatus                                                                        | 11    | 6.25  | 218271, 98733, 18739, 228368, 11766, 320150, 20392, 20452, 252903, 98170, 19338                                                                                                                                                                                                                                                                                                                                                                                                                                                                                                     | 0.0541 | 1.960           |
| UP_SEQ_FEATURE   | compositionally biased region:Poly-Arg                                                 | 5     | 2.84  | 239845, 11504, 17388, 23794, 11790                                                                                                                                                                                                                                                                                                                                                                                                                                                                                                                                                  | 0.0544 | 3.494           |
| GOTERM_CC_DIRECT | GO:0043234~protein complex                                                             | 10    | 5.68  | 17192, 17313, 18211, 12558, 20969, 18759, 15519, 384783, 12394, 20466                                                                                                                                                                                                                                                                                                                                                                                                                                                                                                               | 0.0572 | 2.033           |
| UP_KEYWORDS      | Lipid-binding                                                                          | 5     | 2.84  | 18667, 76742, 214459, 269224, 16592                                                                                                                                                                                                                                                                                                                                                                                                                                                                                                                                                 | 0.0591 | 3.406           |
| UP_SEQ_FEATURE   | lipid moiety-binding region:S-palmitoyl cysteine                                       | 5     | 2.84  | 14432, 11552, 70310, 11539, 13385                                                                                                                                                                                                                                                                                                                                                                                                                                                                                                                                                   | 0.0603 | 3.377           |
| GOTERM_MF_DIRECT | GO:0019901~protein kinase binding                                                      | 8     | 4.55  | 12703, 16890, 12558, 15519, 384783, 73047, 13385, 75580                                                                                                                                                                                                                                                                                                                                                                                                                                                                                                                             | 0.0627 | 2.265           |
| UP_KEYWORDS      | Growth regulation                                                                      | 3     | 1.70  | 12703, 14432, 207683                                                                                                                                                                                                                                                                                                                                                                                                                                                                                                                                                                | 0.0628 | 7.320           |
| GOTERM_BP_DIRECT | GO:0007157~heterophilic cell-cell adhesion via plasma membrane cell adhesion molecules | 3     | 1.70  | 16402, 12558, 224024                                                                                                                                                                                                                                                                                                                                                                                                                                                                                                                                                                | 0.0637 | 7.244           |
| UP_KEYWORDS      | Lipoprotein                                                                            | 11    | 6.25  | 14432, 18667, 11552, 70310, 320150, 11539, 19340, 13385, 244058, 19338, 19416                                                                                                                                                                                                                                                                                                                                                                                                                                                                                                       | 0.0653 | 1.893           |
| UP_KEYWORDS      | Cell projection                                                                        | 10    | 5.68  | 27418, 18752, 14432, 241116, 140486, 72555, 20392, 13385, 12794, 432611                                                                                                                                                                                                                                                                                                                                                                                                                                                                                                             | 0.0658 | 1.979           |
| INTERPRO         | IPR013032:EGF-like, conserved site                                                     | 5     | 2.84  | 17183, 73182, 12223, 109685, 224024                                                                                                                                                                                                                                                                                                                                                                                                                                                                                                                                                 | 0.0667 | 3.267           |
| GOTERM_MF_DIRECT | GO:0030165~PDZ domain binding                                                          | 4     | 2.27  | 72555, 13385, 14362, 53310                                                                                                                                                                                                                                                                                                                                                                                                                                                                                                                                                          | 0.0678 | 4.237           |
| GOTERM_BP_DIRECT | GO:0048705~skeletal system morphogenesis                                               | 3     | 1.70  | 12842, 14260, 19338                                                                                                                                                                                                                                                                                                                                                                                                                                                                                                                                                                 | 0.0681 | 6.976           |
| UP_KEYWORDS      | SH3 domain                                                                             | 5     | 2.84  | 214459, 83813, 17974, 13385, 53310                                                                                                                                                                                                                                                                                                                                                                                                                                                                                                                                                  | 0.0692 | 3.226           |
| GOTERM_BP_DIRECT | GO:0034613~cellular protein localization                                               | 3     | 1.70  | 83409, 18759, 20466                                                                                                                                                                                                                                                                                                                                                                                                                                                                                                                                                                 | 0.0703 | 6.849           |
| GOTERM_CC_DIRECT | GO:0005911~cell-cell junction                                                          | 5     | 2.84  | 18752, 50918, 16402, 12558, 53310                                                                                                                                                                                                                                                                                                                                                                                                                                                                                                                                                   | 0.0722 | 3.176           |
| GOTERM_MF_DIRECT | GO:0004860~protein kinase inhibitor activity                                           | 3     | 1.70  | 12703, 18767, 73047                                                                                                                                                                                                                                                                                                                                                                                                                                                                                                                                                                 | 0.0776 | 6.466           |
| UP_KEYWORDS      | Acetylation                                                                            | 31    | 17.61 | 80288, 67684, 75956, 105663, 18767, 12350, 67959, 269224, 12394, 19340, 319554, 243168, 77254, 230793, 56376, 16592, 13807, 18759, 12349, 71452, 20466, 56812, 66089, 27418, 71994, 21991, 17974, 56390, 17355, 15519, 22628                                                                                                                                                                                                                                                                                                                                                        | 0.0802 | 1.331           |
| GOTERM_CC_DIRECT | GO:0005794~Golgi apparatus                                                             | 15    | 8.52  | 218271, 12842, 68166, 18739, 228368, 20452, 19338, 98733, 16402, 269224, 11766, 320150, 20392, 252903, 98170                                                                                                                                                                                                                                                                                                                                                                                                                                                                        | 0.0804 | 1.609           |
| INTERPRO         | IPR001452:Src homology-3 domain                                                        | 5     | 2.84  | 214459, 83813, 17974, 13385, 53310                                                                                                                                                                                                                                                                                                                                                                                                                                                                                                                                                  | 0.0824 | 3.036           |
| GOTERM_CC_DIRECT | GO:0005923~bicellular tight junction                                                   | 4     | 2.27  | 54420, 12737, 18759, 53310                                                                                                                                                                                                                                                                                                                                                                                                                                                                                                                                                          | 0.0826 | 3.898           |
| GOTERM_BP_DIRECT | GO:0001822~kidney development                                                          | 4     | 2.27  | 11504, 14260, 12349, 21410                                                                                                                                                                                                                                                                                                                                                                                                                                                                                                                                                          | 0.0841 | 3.864           |
| KEGG_PATHWAY     | mmu04923:Regulation of lipolysis in adipocytes                                         | 3     | 1.70  | 16890, 11539, 384783                                                                                                                                                                                                                                                                                                                                                                                                                                                                                                                                                                | 0.0851 | 6.064           |
| UP_KEYWORDS      | EGF-like domain                                                                        | 5     | 2.84  | 17183, 73182, 12223, 109685, 224024                                                                                                                                                                                                                                                                                                                                                                                                                                                                                                                                                 | 0.0855 | 2.996           |
| KEGG_PATHWAY     | mmu05206:MicroRNAs in cancer                                                           | 6     | 3.41  | 18752, 12703, 140486, 16402, 384783, 13435                                                                                                                                                                                                                                                                                                                                                                                                                                                                                                                                          | 0.0863 | 2.505           |
| UP_KEYWORDS      | Metal-binding                                                                          | 33    | 18.75 | 218271, 17313, 17347, 381924, 20437, 105663, 16399, 13998, 18667, 12350, 93691, 16402, 17388, 23794, 13089, 13435, 319554, 56525, 12842, 56376, 18739, 16882, 13807, 18759, 12349, 213484, 66089, 18752, 140792, 208228, 11504, 12558, 75580                                                                                                                                                                                                                                                                                                                                        | 0.0870 | 1.304           |
| UP_SEQ_FEATURE   | transmembrane region                                                                   | 44    | 25.00 | 218271, 50918, 60504, 11552, 70310, 381924, 75571, 228368, 11539, 13642, 20452, 224024, 16399, 14764, 241116, 217219, 382551, 16402, 72055, 207683, 17388, 320150, 12723, 98170, 14615, 77254, 54420, 380712, 12737, 12223, 232664, 54445, 12794, 15937, 73182, 140792, 18211, 239845, 18214, 170813, 12558, 20969, 20392, 14362                                                                                                                                                                                                                                                    | 0.0877 | 1.234           |
| GOTERM_BP_DIRECT | GO:0016192~vesicle-mediated transport                                                  | 5     | 2.84  | 214459, 68166, 11766, 17974, 252903                                                                                                                                                                                                                                                                                                                                                                                                                                                                                                                                                 | 0.0890 | 2.948           |
| GOTERM_MF_DIRECT | GO:0008022~protein C-terminus binding                                                  | 5     | 2.84  | 73569, 20437, 20969, 13385, 53310                                                                                                                                                                                                                                                                                                                                                                                                                                                                                                                                                   | 0.0896 | 2.939           |
| UP_KEYWORDS      | Ubl conjugation                                                                        | 17    | 9.66  | 140486, 67684, 15957, 233863, 20466, 18752, 18211, 94232, 18667, 67959, 140917, 21991, 20392, 15519, 13435, 75580, 14362                                                                                                                                                                                                                                                                                                                                                                                                                                                            | 0.0925 | 1.516           |
| GOTERM_CC_DIRECT | GO:0005811~lipid particle                                                              | 3     | 1.70  | 243168, 16890, 18739                                                                                                                                                                                                                                                                                                                                                                                                                                                                                                                                                                | 0.0935 | 5.803           |
| GOTERM_BP_DIRECT | GO:0071230~cellular response to amino acid stimulus                                    | 4     | 2.27  | 12703, 12842, 83409, 13435                                                                                                                                                                                                                                                                                                                                                                                                                                                                                                                                                          | 0.0949 | 3.666           |
| KEGG_PATHWAY     | mmu05205:Proteoglycans in cancer                                                       | 5     | 2.84  | 18752, 12842, 16402, 20969, 14362                                                                                                                                                                                                                                                                                                                                                                                                                                                                                                                                                   | 0.0951 | 2.838           |
| GOTERM_CC_DIRECT | GO:0031234~extrinsic component of cytoplasmic side of plasma membrane                  | 3     | 1.70  | 54721, 83813, 13385                                                                                                                                                                                                                                                                                                                                                                                                                                                                                                                                                                 | 0.0983 | 5.633           |
| GOTERM_BP_DIRECT | GO:0040008~regulation of growth                                                        | 3     | 1.70  | 12703, 14432, 207683                                                                                                                                                                                                                                                                                                                                                                                                                                                                                                                                                                | 0.1035 | 5.460           |
| KEGG_PATHWAY     | mmu05160:Hepatitis C                                                                   | 4     | 2.27  | 54721, 15957, 54420, 12737                                                                                                                                                                                                                                                                                                                                                                                                                                                                                                                                                          | 0.1102 | 3.389           |
| UP_KEYWORDS      | Endosome                                                                               | 7     | 3.98  | 18211, 83409, 76742, 382551, 11766, 18759, 54445                                                                                                                                                                                                                                                                                                                                                                                                                                                                                                                                    | 0.1121 | 2.121           |
| GOTERM_MF_DIRECT | GO:0008565~protein transporter activity                                                | 3     | 1.70  | 11766, 252903, 54445                                                                                                                                                                                                                                                                                                                                                                                                                                                                                                                                                                | 0.1125 | 5.191           |
| UP_KEYWORDS      | Cleavage on pair of basic residues                                                     | 5     | 2.84  | 16402, 11504, 17388, 12558, 23794                                                                                                                                                                                                                                                                                                                                                                                                                                                                                                                                                   | 0.1132 | 2.706           |

## Supplemental File 3. Continuation.

| Category         | Term                                                            | Count | %     | Genes                                                                                                                                                                                                                                                                                     | PValue | Fold Enrichment |
|------------------|-----------------------------------------------------------------|-------|-------|-------------------------------------------------------------------------------------------------------------------------------------------------------------------------------------------------------------------------------------------------------------------------------------------|--------|-----------------|
| UP_KEYWORDS      | Lysosome                                                        | 5     | 2.84  | 110173, 83409, 382551, 109685, 54445                                                                                                                                                                                                                                                      | 0.1142 | 2.695           |
| GOTERM_BP_DIRECT | GO:0007411~axon guidance                                        | 4     | 2.27  | 18211, 14432, 93691, 13642                                                                                                                                                                                                                                                                | 0.1148 | 3.371           |
| KEGG_PATHWAY     | mmu04530:Tight junction                                         | 4     | 2.27  | 18752, 54420, 12737, 18759                                                                                                                                                                                                                                                                | 0.1156 | 3.316           |
| UP_KEYWORDS      | Disulfide bond                                                  | 30    | 17.05 | 17313, 60504, 11552, 381924, 11790, 11539, 13642, 20452, 224024, 16399, 14764, 16402, 382551, 17388, 207683, 23794, 244058, 12842, 16592, 12737, 12223, 17183, 140792, 73182, 18211, 98733, 18214, 11504, 109685, 14362                                                                   | 0.1161 | 1.289           |
| INTERPRO         | IPR001478:PDZ domain                                            | 4     | 2.27  | 56376, 76742, 13385, 53310                                                                                                                                                                                                                                                                | 0.1168 | 3.343           |
| GOTERM_MF_DIRECT | GO:0005102~receptor binding                                     | 7     | 3.98  | 54721, 83813, 13642, 70827, 13385, 244058, 14362                                                                                                                                                                                                                                          | 0.1174 | 2.087           |
| GOTERM_CC_DIRECT | GO:0009986~cell surface                                         | 9     | 5.11  | 17826, 18211, 227290, 16402, 20969, 15519, 244058, 16399, 14362                                                                                                                                                                                                                           | 0.1183 | 1.827           |
| UP_SEQ_FEATURE   | domain:Protein kinase                                           | 8     | 4.55  | 18752, 17347, 18211, 18647, 83813, 18214, 269224, 18759                                                                                                                                                                                                                                   | 0.1203 | 1.926           |
| KEGG_PATHWAY     | mmu05412:Arrhythmogenic right ventricular cardiomyopathy (ARVC) | 3     | 1.70  | 16402, 12558, 16399                                                                                                                                                                                                                                                                       | 0.1230 | 4.869           |
| GOTERM_MF_DIRECT | GO:0051082~unfolded protein binding                             | 3     | 1.70  | 227290, 15519, 56812                                                                                                                                                                                                                                                                      | 0.1231 | 4.914           |
| GOTERM_CC_DIRECT | GO:0015630~microtubule cytoskeleton                             | 4     | 2.27  | 227290, 14260, 18759, 67254                                                                                                                                                                                                                                                               | 0.1253 | 3.232           |
| GOTERM_CC_DIRECT | GO:0032587~ruffle membrane                                      | 3     | 1.70  | 67220, 16402, 15519                                                                                                                                                                                                                                                                       | 0.1260 | 4.848           |
| UP_KEYWORDS      | Cell adhesion                                                   | 7     | 3.98  | 16402, 381924, 207683, 12558, 224024, 16399, 12837                                                                                                                                                                                                                                        | 0.1266 | 2.047           |
| GOTERM_BP_DIRECT | GO:0042493~response to drug                                     | 6     | 3.41  | 12842, 18211, 21410, 15519, 13435, 14362                                                                                                                                                                                                                                                  | 0.1316 | 2.222           |
| GOTERM_MF_DIRECT | GO:0001948~glycoprotein binding                                 | 3     | 1.70  | 20969, 15519, 244058                                                                                                                                                                                                                                                                      | 0.1339 | 4.666           |
| UP_KEYWORDS      | ATP-binding                                                     | 15    | 8.52  | 17347, 54721, 16882, 18759, 11790, 18752, 18211, 83813, 18647, 18214, 269224, 15519, 244059, 233001, 224742                                                                                                                                                                               | 0.1350 | 1.477           |
| GOTERM_MF_DIRECT | GO:0003779~actin binding                                        | 6     | 3.41  | 56376, 68166, 14260, 71994, 68524, 22628                                                                                                                                                                                                                                                  | 0.1392 | 2.181           |
| UP_KEYWORDS      | Postsynaptic cell membrane                                      | 4     | 2.27  | 239845, 56376, 13385, 12794                                                                                                                                                                                                                                                               | 0.1425 | 3.050           |
| INTERPRO         | IPR008979:Galactose-binding domain-like                         | 3     | 1.70  | 27418, 110173, 18214                                                                                                                                                                                                                                                                      | 0.1427 | 4.490           |
| UP_SEQ_FEATURE   | compositionally biased region:Pro-rich                          | 10    | 5.68  | 230793, 73182, 80288, 83813, 14260, 75956, 11790, 71452, 114601, 224024                                                                                                                                                                                                                   | 0.1482 | 1.654           |
| SMART            | SM00228:PDZ                                                     | 4     | 2.27  | 56376, 76742, 13385, 53310                                                                                                                                                                                                                                                                | 0.1499 | 2.957           |
| GOTERM_MF_DIRECT | GO:0000166~nucleotide binding                                   | 21    | 11.93 | 17347, 54721, 140486, 30946, 16882, 11790, 18759, 19338, 18752, 18211, 67959, 18647, 83813, 18214, 269224, 15519, 244059, 224742, 19340, 233001, 19416                                                                                                                                    | 0.1499 | 1.333           |
| GOTERM_BP_DIRECT | GO:0032869~cellular response to insulin stimulus                | 3     | 1.70  | 18759, 384783, 22628                                                                                                                                                                                                                                                                      | 0.1537 | 4.281           |
| UP_KEYWORDS      | Nucleotide-binding                                              | 18    | 10.23 | 17347, 54721, 16882, 18759, 11790, 19338, 18752, 18211, 83813, 18647, 18214, 269224, 15519, 244059, 224742, 19340, 233001, 19416                                                                                                                                                          | 0.1544 | 1.377           |
| UP_SEQ_FEATURE   | compositionally biased region:Poly-Pro                          | 6     | 3.41  | 76022, 217219, 70310, 68524, 17355, 14362                                                                                                                                                                                                                                                 | 0.1552 | 2.102           |
| GOTERM_BP_DIRECT | GO:0007268~chemical synaptic transmission                       | 4     | 2.27  | 18752, 14764, 14615, 53310                                                                                                                                                                                                                                                                | 0.1556 | 2.920           |
| GOTERM_BP_DIRECT | GO:0060070~canonical Wnt signaling pathway                      | 3     | 1.70  | 80288, 20969, 14362                                                                                                                                                                                                                                                                       | 0.1565 | 4.233           |
| UP_SEQ_FEATURE   | domain:SH3                                                      | 4     | 2.27  | 214459, 83813, 13385, 53310                                                                                                                                                                                                                                                               | 0.1568 | 2.913           |
| GOTERM_BP_DIRECT | GO:0007568~aging                                                | 4     | 2.27  | 17192, 18211, 13435, 20466                                                                                                                                                                                                                                                                | 0.1570 | 2.903           |
| KEGG_PATHWAY     | mmu04514:Cell adhesion molecules (CAMs)                         | 4     | 2.27  | 54420, 12558, 12737, 20969                                                                                                                                                                                                                                                                | 0.1606 | 2.845           |
| GOTERM_MF_DIRECT | GO:0035091~phosphatidylinositol binding                         | 3     | 1.70  | 76742, 18739, 269224                                                                                                                                                                                                                                                                      | 0.1619 | 4.141           |
| GOTERM_BP_DIRECT | GO:0030154~cell differentiation                                 | 10    | 5.68  | 17313, 54721, 195434, 18211, 14432, 83813, 75571, 20437, 11790, 13642                                                                                                                                                                                                                     | 0.1654 | 1.610           |
| KEGG_PATHWAY     | mmu04012:ErbB signaling pathway                                 | 3     | 1.70  | 18752, 17974, 12223                                                                                                                                                                                                                                                                       | 0.1702 | 3.973           |
| GOTERM_MF_DIRECT | GO:0019900~kinase binding                                       | 3     | 1.70  | 18211, 13385, 53310                                                                                                                                                                                                                                                                       | 0.1705 | 4.006           |
| UP_KEYWORDS      | Translation regulation                                          | 3     | 1.70  | 17347, 140486, 17974                                                                                                                                                                                                                                                                      | 0.1722 | 3.986           |
| GOTERM_CC_DIRECT | GO:0005604~basement membrane                                    | 3     | 1.70  | 11504, 12394, 12837                                                                                                                                                                                                                                                                       | 0.1745 | 3.949           |
| GOTERM_MF_DIRECT | GO:0008289~lipid binding                                        | 5     | 2.84  | 18667, 76742, 214459, 269224, 16592                                                                                                                                                                                                                                                       | 0.1752 | 2.275           |
| GOTERM_BP_DIRECT | GO:0001503~ossification                                         | 3     | 1.70  | 17313, 18214, 12394                                                                                                                                                                                                                                                                       | 0.1760 | 3.924           |
| UP_SEQ_FEATURE   | disulfide bond                                                  | 26    | 14.77 | 17313, 60504, 11552, 381924, 11539, 11790, 13642, 20452, 224024, 16399, 14764, 16402, 382551, 17388, 207683, 23794, 16592, 12223, 17183, 140792, 73182, 18211, 18214, 11504, 109685, 14362                                                                                                | 0.1765 | 1.252           |
| KEGG_PATHWAY     | mmu04151:PI3K-Akt signaling pathway                             | 6     | 3.41  | 12842, 16402, 21770, 15519, 22628, 16399                                                                                                                                                                                                                                                  | 0.1801 | 1.970           |
| UP_KEYWORDS      | SH2 domain                                                      | 3     | 1.70  | 54721, 12703, 17974                                                                                                                                                                                                                                                                       | 0.1828 | 3.834           |
| UP_KEYWORDS      | Glycoprotein                                                    | 34    | 19.32 | 218271, 60504, 381924, 11539, 13642, 20452, 224024, 16399, 14764, 16402, 217219, 207683, 17388, 72555, 23794, 98170, 244058, 110173, 12842, 12223, 54445, 15937, 17183, 73182, 140792, 239845, 18211, 18214, 11504, 12558, 20969, 20392, 109685, 14362                                    | 0.1885 | 1.196           |
| GOTERM_CC_DIRECT | GO:0043209~myelin sheath                                        | 4     | 2.27  | 13807, 12349, 15519, 22628                                                                                                                                                                                                                                                                | 0.1885 | 2.660           |
| UP_KEYWORDS      | Developmental protein                                           | 11    | 6.25  | 17313, 195434, 18211, 14432, 75571, 20437, 18759, 13642, 384452, 210719, 14362                                                                                                                                                                                                            | 0.1886 | 1.513           |
| GOTERM_CC_DIRECT | GO:0070062~extracellular exosome                                | 26    | 14.77 | 17313, 50918, 276919, 16399, 12837, 207683, 406220, 244059, 98170, 244058, 19340, 54721, 16592, 13807, 18759, 12349, 19338, 140792, 83409, 214459, 18214, 12558, 21991, 20969, 22628, 15519                                                                                               | 0.1890 | 1.241           |
| GOTERM_BP_DIRECT | GO:0015031~protein transport                                    | 8     | 4.55  | 12842, 76742, 68166, 18739, 11766, 252903, 19340, 19338                                                                                                                                                                                                                                   | 0.1892 | 1.697           |
| UP_KEYWORDS      | Magnesium                                                       | 7     | 3.98  | 319554, 17347, 381924, 16882, 13807, 105663, 213484                                                                                                                                                                                                                                       | 0.1906 | 1.803           |
| GOTERM_BP_DIRECT | GO:0007275~multicellular organism development                   | 12    | 6.82  | 17313, 195434, 18211, 14432, 75571, 20437, 21991, 18759, 13642, 384452, 210719, 14362                                                                                                                                                                                                     | 0.1915 | 1.464           |
| GOTERM_BP_DIRECT | GO:0007267~cell-cell signaling                                  | 3     | 1.70  | 11552, 14362, 14615                                                                                                                                                                                                                                                                       | 0.1960 | 3.657           |
| UP_KEYWORDS      | Differentiation                                                 | 8     | 4.55  | 17313, 195434, 18211, 14432, 75571, 20437, 11790, 13642                                                                                                                                                                                                                                   | 0.2040 | 1.662           |
| UP_KEYWORDS      | Repressor                                                       | 7     | 3.98  | 76022, 67959, 12394, 13435, 20466, 75580, 353282                                                                                                                                                                                                                                          | 0.2054 | 1.759           |
| GOTERM_CC_DIRECT | GO:0000139~Golgi membrane                                       | 6     | 3.41  | 228368, 11766, 320150, 18759, 98170, 19338                                                                                                                                                                                                                                                | 0.2059 | 1.901           |
| GOTERM_CC_DIRECT | GO:0005730~nucleolus                                            | 10    | 5.68  | 17192, 53414, 17347, 195434, 80288, 30946, 276919, 233863, 20466, 244059                                                                                                                                                                                                                  | 0.2101 | 1.516           |
| KEGG_PATHWAY     | mmu04972:Pancreatic secretion                                   | 3     | 1.70  | 18752, 12349, 19340                                                                                                                                                                                                                                                                       | 0.2105 | 3.457           |
| GOTERM_BP_DIRECT | GO:0035556~intracellular signal transduction                    | 6     | 3.41  | 18752, 17347, 142688, 54721, 12703, 18759                                                                                                                                                                                                                                                 | 0.2106 | 1.884           |
| GOTERM_BP_DIRECT | GO:0001701~in utero embryonic development                       | 5     | 2.84  | 17192, 53414, 11790, 12394, 20466                                                                                                                                                                                                                                                         | 0.2123 | 2.100           |
| GOTERM_BP_DIRECT | GO:0030335~positive regulation of cell migration                | 4     | 2.27  | 50918, 12842, 16402, 384783                                                                                                                                                                                                                                                               | 0.2170 | 2.474           |
| INTERPRO         | IPR000980:SH2 domain                                            | 3     | 1.70  | 54721, 12703, 17974                                                                                                                                                                                                                                                                       | 0.2171 | 3.417           |
| UP_KEYWORDS      | Nucleus                                                         | 39    | 22.16 | 17347, 80288, 67684, 75956, 20437, 30946, 11790, 21410, 233863, 17192, 195434, 12703, 18667, 94232, 76022, 67959, 93691, 18647, 269224, 140917, 13435, 12394, 244059, 224742, 19416, 353282, 140486, 73569, 14260, 16882, 18759, 384452, 210719, 20466, 53414, 67220, 17355, 75580, 73047 | 0.2218 | 1.154           |
| KEGG_PATHWAY     | mmu04066:HIF-1 signaling pathway                                | 3     | 1.70  | 18752, 17347, 13807                                                                                                                                                                                                                                                                       | 0.2231 | 3.324           |
| GOTERM_CC_DIRECT | GO:0045177~apical part of cell                                  | 3     | 1.70  | 53414, 12349, 18759                                                                                                                                                                                                                                                                       | 0.2254 | 3.331           |
| UP_SEQ_FEATURE   | compositionally biased region:Poly-Glu                          | 6     | 3.41  | 76022, 76156, 11790, 71452, 114601, 17355                                                                                                                                                                                                                                                 | 0.2284 | 1.827           |

## Supplemental File 3. Continuation.

| Category         | Term                                                                | Count | %     | Genes                                                                                                                                                                                                                                                                                                                                                                                   | PValue | Fold Enrichment |
|------------------|---------------------------------------------------------------------|-------|-------|-----------------------------------------------------------------------------------------------------------------------------------------------------------------------------------------------------------------------------------------------------------------------------------------------------------------------------------------------------------------------------------------|--------|-----------------|
| GOTERM_CC_DIRECT | GO:0005783~endoplasmic reticulum                                    | 14    | 7.95  | 17313, 18667, 12842, 94232, 54420, 16402, 18739, 17974, 11539, 54445, 98170, 13385, 244058, 12794                                                                                                                                                                                                                                                                                       | 0.2304 | 1.351           |
| GOTERM_MF_DIRECT | GO:0046872~metal ion binding                                        | 32    | 18.18 |                                                                                                                                                                                                                                                                                                                                                                                         | 0.2307 | 1.172           |
|                  |                                                                     |       |       | 218271, 17347, 381924, 20437, 105663, 13998, 16399, 18667, 12350, 93691, 16402, 17388, 23794, 230761, 13435, 319554, 56525, 12842, 56376, 18739, 13807, 16882, 18759, 12349, 213484, 66089, 18752, 140792, 208228, 11504, 12558, 75580                                                                                                                                                  |        |                 |
| UP_KEYWORDS      | Autophagy                                                           | 3     | 1.70  | 94232, 214459, 19338                                                                                                                                                                                                                                                                                                                                                                    | 0.2314 | 3.273           |
| GOTERM_CC_DIRECT | GO:0005913~cell-cell adherens junction                              | 5     | 2.84  | 208177, 56376, 67959, 71994, 12558                                                                                                                                                                                                                                                                                                                                                      | 0.2323 | 2.020           |
| GOTERM_MF_DIRECT | GO:0003677~DNA binding                                              | 19    | 10.80 | 230793, 67684, 30946, 16882, 21410, 319758, 384452, 210719, 233863, 20466, 17192, 18667, 76022, 67959, 93691, 13435, 244059, 12394, 75580                                                                                                                                                                                                                                               | 0.2342 | 1.264           |
| GOTERM_MF_DIRECT | GO:0005524~ATP binding                                              | 16    | 9.09  |                                                                                                                                                                                                                                                                                                                                                                                         | 0.2359 | 1.304           |
|                  |                                                                     |       |       | 17347, 54721, 16882, 18759, 11790, 18752, 18211, 83813, 18647, 18214, 269224, 15519, 244059, 12394, 233001, 224742                                                                                                                                                                                                                                                                      |        |                 |
| KEGG_PATHWAY     | mmu04114:Oocyte meiosis                                             | 3     | 1.70  | 18667, 21770, 22628                                                                                                                                                                                                                                                                                                                                                                     | 0.2421 | 3.142           |
| UP_KEYWORDS      | Tumor suppressor                                                    | 3     | 1.70  | 67220, 320150, 18759                                                                                                                                                                                                                                                                                                                                                                    | 0.2450 | 3.145           |
| GOTERM_BP_DIRECT | GO:0006417~regulation of translation                                | 3     | 1.70  | 17347, 140486, 17974                                                                                                                                                                                                                                                                                                                                                                    | 0.2483 | 3.113           |
| GOTERM_CC_DIRECT | GO:0005768~endosome                                                 | 7     | 3.98  | 18211, 83409, 76742, 382551, 11766, 18759, 54445                                                                                                                                                                                                                                                                                                                                        | 0.2500 | 1.643           |
| KEGG_PATHWAY     | mmu05200:Pathways in cancer                                         | 6     | 3.41  | 18752, 18211, 15519, 12394, 16399, 14362                                                                                                                                                                                                                                                                                                                                                | 0.2511 | 1.741           |
| GOTERM_BP_DIRECT | GO:0002230~positive regulation of defense response to virus by host | 3     | 1.70  | 228368, 76156, 20466                                                                                                                                                                                                                                                                                                                                                                    | 0.2512 | 3.088           |
| GOTERM_CC_DIRECT | GO:0016324~apical plasma membrane                                   | 5     | 2.84  | 18214, 12558, 12737, 18759, 15519                                                                                                                                                                                                                                                                                                                                                       | 0.2524 | 1.946           |
| UP_KEYWORDS      | Extracellular matrix                                                | 4     | 2.27  | 12842, 11504, 23794, 12837                                                                                                                                                                                                                                                                                                                                                              | 0.2528 | 2.284           |
| GOTERM_CC_DIRECT | GO:0005769~early endosome                                           | 4     | 2.27  | 18211, 76742, 382551, 20437                                                                                                                                                                                                                                                                                                                                                             | 0.2565 | 2.260           |
| UP_KEYWORDS      | Protein transport                                                   | 7     | 3.98  | 76742, 68166, 18739, 11766, 252903, 19340, 19338                                                                                                                                                                                                                                                                                                                                        | 0.2570 | 1.628           |
| SMART            | SM00326:SH3                                                         | 4     | 2.27  | 214459, 17974, 13385, 53310                                                                                                                                                                                                                                                                                                                                                             | 0.2571 | 2.252           |
| GOTERM_CC_DIRECT | GO:0005634~nucleus                                                  | 52    | 29.55 | 17347, 80288, 75956, 20437, 233863, 70827, 16890, 94232, 93691, 18647, 269224, 140917, 224742, 19416, 54721, 384452, 56812, 66089, 17355, 75580, 67684, 30946, 11790, 21410, 276919, 18767, 17192, 195434, 12703, 18667, 76022, 67959, 244059, 12394, 13435, 353282, 140486, 73569, 14260, 16882, 18759, 319758, 210719, 105203, 20466, 15937, 53414, 18752, 67220, 21991, 15519, 73047 | 0.2574 | 1.103           |
|                  |                                                                     |       |       | 110173, 83409, 382551, 109685, 54445                                                                                                                                                                                                                                                                                                                                                    | 0.2575 | 1.929           |
| GOTERM_CC_DIRECT | GO:0005764~lysosome                                                 | 5     | 2.84  | 18752, 12842, 16402, 16399                                                                                                                                                                                                                                                                                                                                                              | 0.2601 | 2.227           |
| KEGG_PATHWAY     | mmu04510:Focal adhesion                                             | 4     | 2.27  | 18752, 17347, 54721, 18211, 18647, 83813, 18214, 269224, 18759, 11790, 233001                                                                                                                                                                                                                                                                                                           | 0.2683 | 1.381           |
| UP_SEQ_FEATURE   | nucleotide phosphate-binding region:ATP                             | 11    | 6.25  | 17183, 73182, 12223, 224024                                                                                                                                                                                                                                                                                                                                                             | 0.2734 | 2.172           |
| INTERPRO         | IPR000742:Epidermal growth factor-like domain                       | 4     | 2.27  | 76022, 21410, 384452, 210719, 244059                                                                                                                                                                                                                                                                                                                                                    | 0.2770 | 1.865           |
| INTERPRO         | IPR009057:Homeodomain-like                                          | 5     | 2.84  | 18752, 54420, 12737                                                                                                                                                                                                                                                                                                                                                                     | 0.2770 | 2.857           |
| KEGG_PATHWAY     | mmu04670:Leukocyte transendothelial migration                       | 3     | 1.70  | 76742, 11766, 252903, 54445                                                                                                                                                                                                                                                                                                                                                             | 0.2782 | 2.165           |
| GOTERM_BP_DIRECT | GO:0006886~intracellular protein transport                          | 4     | 2.27  | 110173, 11766, 252903                                                                                                                                                                                                                                                                                                                                                                   | 0.2802 | 2.833           |
| KEGG_PATHWAY     | mmu04142:Lysosome                                                   | 3     | 1.70  | 18752, 17347, 18759                                                                                                                                                                                                                                                                                                                                                                     | 0.2837 | 2.832           |
| GOTERM_BP_DIRECT | GO:0018105~peptidyl-serine phosphorylation                          | 3     | 1.70  | 18752, 21770, 11539                                                                                                                                                                                                                                                                                                                                                                     | 0.2866 | 2.788           |
| KEGG_PATHWAY     | mmu04071:Sphingolipid signaling pathway                             | 3     | 1.70  | 68166, 14260, 71994, 68524                                                                                                                                                                                                                                                                                                                                                              | 0.2873 | 2.130           |
| UP_KEYWORDS      | Actin-binding                                                       | 4     | 2.27  | 53414, 241116, 67959, 67684, 140486, 76917, 75956, 30946, 15519, 22628, 244059, 224742                                                                                                                                                                                                                                                                                                  | 0.2889 | 1.325           |
| GOTERM_MF_DIRECT | GO:0044822~poly(A) RNA binding                                      | 12    | 6.82  | 56525, 17347, 56376, 20437, 16882, 12349, 18759, 66089, 13998, 18752, 18667, 12350, 208228, 93691, 11504, 17388, 23794, 13435, 75580                                                                                                                                                                                                                                                    | 0.2920 | 1.215           |
| UP_KEYWORDS      | Zinc                                                                | 19    | 10.80 |                                                                                                                                                                                                                                                                                                                                                                                         | 0.2938 | 1.476           |
| GOTERM_CC_DIRECT | GO:0048471~perinuclear region of cytoplasm                          | 8     | 4.55  | 12350, 13807, 12349                                                                                                                                                                                                                                                                                                                                                                     | 0.2944 | 2.758           |
| UP_KEYWORDS      | Lyase                                                               | 3     | 1.70  | 16890, 21770, 384783                                                                                                                                                                                                                                                                                                                                                                    | 0.2961 | 2.722           |
| KEGG_PATHWAY     | mmu04152:AMPK signaling pathway                                     | 3     | 1.70  | 54420, 406220, 12737, 13385                                                                                                                                                                                                                                                                                                                                                             | 0.2980 | 2.082           |
| GOTERM_MF_DIRECT | GO:0005198~structural molecule activity                             | 4     | 2.27  | 230793, 67684, 30946, 21410, 384452, 210719, 233863, 17192, 18667, 67959, 93691, 244059, 12394, 13435, 75580                                                                                                                                                                                                                                                                            | 0.3011 | 1.255           |
| UP_KEYWORDS      | DNA-binding                                                         | 15    | 8.52  | 27418, 67220, 68524                                                                                                                                                                                                                                                                                                                                                                     | 0.3013 | 2.710           |
| GOTERM_BP_DIRECT | GO:0008360~regulation of cell shape                                 | 3     | 1.70  | 12842, 18667, 93691, 21410, 17355, 12394, 14362                                                                                                                                                                                                                                                                                                                                         | 0.3049 | 1.526           |
| GOTERM_BP_DIRECT | GO:0045893~positive regulation of transcription, DNA-templated      | 7     | 3.98  | 27418, 214459, 68166                                                                                                                                                                                                                                                                                                                                                                    | 0.3088 | 2.660           |
| GOTERM_CC_DIRECT | GO:0005938~cell cortex                                              | 3     | 1.70  | 12842, 18759, 16399                                                                                                                                                                                                                                                                                                                                                                     | 0.3088 | 2.639           |
| KEGG_PATHWAY     | mmu04611:Platelet activation                                        | 3     | 1.70  | 94232, 214459, 19338                                                                                                                                                                                                                                                                                                                                                                    | 0.3100 | 2.653           |
| GOTERM_BP_DIRECT | GO:0006914~autophagy                                                | 3     | 1.70  | 12350, 13807, 12349                                                                                                                                                                                                                                                                                                                                                                     | 0.3112 | 2.652           |
| GOTERM_MF_DIRECT | GO:0016829~lyase activity                                           | 3     | 1.70  | 218271, 60504, 381924, 11539, 13642, 20452, 224024, 16399, 14764, 16402, 217219, 207683, 17388, 23794, 98170, 244058, 110173, 12842, 12223, 54445, 15937, 17183, 73182, 140792, 239845, 18211, 18214, 11504, 12558, 20969, 20392, 109685, 14362                                                                                                                                         | 0.3168 | 1.120           |
| UP_SEQ_FEATURE   | glycosylation site:N-linked (GlcNAc...)                             | 33    | 18.75 | 67684, 140486, 15519                                                                                                                                                                                                                                                                                                                                                                    | 0.3188 | 2.596           |
| GOTERM_MF_DIRECT | GO:0003729~mRNA binding                                             | 3     | 1.70  | 18211, 14432, 18667, 140486, 12349                                                                                                                                                                                                                                                                                                                                                      | 0.3253 | 1.725           |
| GOTERM_CC_DIRECT | GO:0030424~axon                                                     | 5     | 2.84  | 12558, 17974, 21410, 20466, 13385                                                                                                                                                                                                                                                                                                                                                       | 0.3285 | 1.716           |
| GOTERM_MF_DIRECT | GO:0032403~protein complex binding                                  | 5     | 2.84  | 208177, 67220, 384783, 13998                                                                                                                                                                                                                                                                                                                                                            | 0.3297 | 1.965           |
| INTERPRO         | IPR001849:Pleckstrin homology domain                                | 4     | 2.27  | 18752, 20437, 14362                                                                                                                                                                                                                                                                                                                                                                     | 0.3403 | 2.452           |
| KEGG_PATHWAY     | mmu04310:Wnt signaling pathway                                      | 3     | 1.70  | 218271, 17347, 54721, 18759, 11790, 20452, 18752, 18211, 83813, 18647, 18214, 269224, 320150, 13435, 73047                                                                                                                                                                                                                                                                              | 0.3418 | 1.217           |
| UP_KEYWORDS      | Transferase                                                         | 15    | 8.52  | 30946, 21410, 210719, 20466                                                                                                                                                                                                                                                                                                                                                             | 0.3445 | 1.913           |
| GOTERM_CC_DIRECT | GO:0005667~transcription factor complex                             | 4     | 2.27  | 227290, 11504, 23794                                                                                                                                                                                                                                                                                                                                                                    | 0.3455 | 2.441           |
| GOTERM_MF_DIRECT | GO:0008201~heparin binding                                          | 3     | 1.70  | 54721, 12703, 60504                                                                                                                                                                                                                                                                                                                                                                     | 0.3528 | 2.384           |
| KEGG_PATHWAY     | mmu04630:Jak-STAT signaling pathway                                 | 3     | 1.70  | 18752, 18211, 18759                                                                                                                                                                                                                                                                                                                                                                     | 0.3617 | 2.354           |
| GOTERM_BP_DIRECT | GO:0043524~negative regulation of neuron apoptotic process          | 3     | 1.70  | 214459, 11766, 17974                                                                                                                                                                                                                                                                                                                                                                    | 0.3653 | 2.336           |
| GOTERM_CC_DIRECT | GO:0005802~trans-Golgi network                                      | 3     | 1.70  | 18752, 18667, 56376, 12350, 11504, 20437, 17388, 16882, 23794, 320150, 12349                                                                                                                                                                                                                                                                                                            | 0.3700 | 1.257           |
| GOTERM_MF_DIRECT | GO:0008270~zinc ion binding                                         | 11    | 6.25  | 11552, 71994, 233863                                                                                                                                                                                                                                                                                                                                                                    | 0.3880 | 2.225           |
| UP_SEQ_FEATURE   | compositionally biased region:Asp/Glu-rich (acidic)                 | 3     | 1.70  | 208177, 67220, 54721, 384783, 13998                                                                                                                                                                                                                                                                                                                                                     | 0.3885 | 1.574           |
| INTERPRO         | IPR011993:Pleckstrin homology-like domain                           | 5     | 2.84  | 214459, 384452, 432611                                                                                                                                                                                                                                                                                                                                                                  | 0.3901 | 2.216           |
| GOTERM_BP_DIRECT | GO:0060271~cilium morphogenesis                                     | 3     | 1.70  |                                                                                                                                                                                                                                                                                                                                                                                         |        |                 |

## Supplemental File 3. Continuation.

| Category         | Term                                                                                     | Count | %     | Genes                                                                                                                                                                                                                                                            | PValue | Fold Enrichment |
|------------------|------------------------------------------------------------------------------------------|-------|-------|------------------------------------------------------------------------------------------------------------------------------------------------------------------------------------------------------------------------------------------------------------------|--------|-----------------|
| GOTERM_MF_DIRECT | GO:0098641~cadherin binding involved in cell-cell adhesion                               | 4     | 2.27  | 208177, 56376, 67959, 71994                                                                                                                                                                                                                                      | 0.3928 | 1.761           |
| SMART            | SM00233:PH                                                                               | 4     | 2.27  | 208177, 67220, 384783, 13998                                                                                                                                                                                                                                     | 0.3936 | 1.753           |
| UP_SEQ_FEATURE   | compositionally biased region:Poly-Lys                                                   | 3     | 1.70  | 73884, 76022, 30946                                                                                                                                                                                                                                              | 0.3975 | 2.185           |
| GOTERM_CC_DIRECT | GO:0043025~neuronal cell body                                                            | 6     | 3.41  | 18211, 71994, 13807, 11539, 15519, 53310                                                                                                                                                                                                                         | 0.4020 | 1.435           |
| UP_KEYWORDS      | Transcription                                                                            | 16    | 9.09  |                                                                                                                                                                                                                                                                  | 0.4040 | 1.155           |
|                  |                                                                                          |       |       | 80288, 73569, 30946, 21410, 384452, 233863, 20466, 17192, 18667, 76022, 67959, 93691, 244059, 12394, 13435, 75580                                                                                                                                                |        |                 |
| UP_KEYWORDS      | Spermatogenesis                                                                          | 3     | 1.70  | 195434, 75571, 20437                                                                                                                                                                                                                                             | 0.4067 | 2.142           |
| UP_SEQ_FEATURE   | compositionally biased region:Poly-Ala                                                   | 4     | 2.27  | 73884, 30946, 23794, 244058                                                                                                                                                                                                                                      | 0.4073 | 1.721           |
| UP_KEYWORDS      | Isopeptide bond                                                                          | 9     | 5.11  | 18667, 76022, 67959, 67684, 140486, 21991, 233863, 224742, 75580                                                                                                                                                                                                 | 0.4103 | 1.267           |
| GOTERM_MF_DIRECT | GO:0016740~transferase activity                                                          | 14    | 7.95  | 218271, 17347, 54721, 18759, 11790, 20452, 18752, 18211, 83813, 18647, 18214, 269224, 320150, 13435                                                                                                                                                              | 0.4115 | 1.168           |
| GOTERM_MF_DIRECT | GO:0019904~protein domain specific binding                                               | 4     | 2.27  | 18759, 384783, 22628, 53310                                                                                                                                                                                                                                      | 0.4145 | 1.700           |
| UP_SEQ_FEATURE   | signal peptide                                                                           | 28    | 15.91 | 17313, 60504, 381924, 13642, 224024, 16399, 12837, 16402, 382551, 217219, 17388, 207683, 23794, 98170, 244058, 243168, 110173, 12842, 12223, 17183, 73182, 18211, 18214, 11504, 12558, 20969, 109685, 14362                                                      | 0.4193 | 1.083           |
| GOTERM_BP_DIRECT | GO:0006351~transcription, DNA-templated                                                  | 17    | 9.66  | 80288, 73569, 30946, 21410, 384452, 233863, 20466, 17192, 18667, 76022, 67959, 93691, 17355, 244059, 12394, 13435, 75580                                                                                                                                         | 0.4217 | 1.132           |
| KEGG_PATHWAY     | mmu04141:Protein processing in endoplasmic reticulum                                     | 3     | 1.70  | 94232, 15519, 56812                                                                                                                                                                                                                                              | 0.4229 | 2.058           |
| UP_KEYWORDS      | Coiled coil                                                                              | 25    | 14.20 | 208177, 73884, 67684, 15957, 212706, 14260, 75956, 30946, 232664, 114601, 70827, 20466, 17183, 17192, 195434, 140792, 239845, 66611, 241116, 214459, 406220, 72055, 15519, 75580, 224742                                                                         | 0.4254 | 1.091           |
| GOTERM_BP_DIRECT | GO:0001934~positive regulation of protein phosphorylation                                | 3     | 1.70  | 18211, 244058, 14362                                                                                                                                                                                                                                             | 0.4285 | 2.047           |
| KEGG_PATHWAY     | mmu04022:cGMP-PKG signaling pathway                                                      | 3     | 1.70  | 11552, 11539, 384783                                                                                                                                                                                                                                             | 0.4317 | 2.021           |
| GOTERM_MF_DIRECT | GO:0005516~calmodulin binding                                                            | 3     | 1.70  | 17347, 14432, 71994                                                                                                                                                                                                                                              | 0.4339 | 2.025           |
| GOTERM_BP_DIRECT | GO:0098609~cell-cell adhesion                                                            | 3     | 1.70  | 56376, 67959, 71994                                                                                                                                                                                                                                              | 0.4419 | 1.993           |
| GOTERM_CC_DIRECT | GO:0005578~proteinaceous extracellular matrix                                            | 4     | 2.27  | 12842, 11504, 23794, 12837                                                                                                                                                                                                                                       | 0.4470 | 1.616           |
| GOTERM_CC_DIRECT | GO:0009897~external side of plasma membrane                                              | 4     | 2.27  | 16402, 20969, 432611, 16399                                                                                                                                                                                                                                      | 0.4491 | 1.611           |
| UP_SEQ_FEATURE   | mutagenesis site                                                                         | 8     | 4.55  | 12703, 83813, 11504, 21991, 18759, 12394, 13435, 20466                                                                                                                                                                                                           | 0.4501 | 1.253           |
| UP_SEQ_FEATURE   | binding site:Substrate                                                                   | 4     | 2.27  | 319554, 243168, 13807, 21991                                                                                                                                                                                                                                     | 0.4572 | 1.591           |
| UP_KEYWORDS      | Polymorphism                                                                             | 3     | 1.70  | 17183, 60504, 21410                                                                                                                                                                                                                                              | 0.4606 | 1.926           |
| UP_KEYWORDS      | Transcription regulation                                                                 | 15    | 8.52  | 80288, 73569, 30946, 21410, 384452, 20466, 17192, 18667, 76022, 67959, 93691, 244059, 12394, 13435, 75580                                                                                                                                                        | 0.4643 | 1.119           |
| GOTERM_BP_DIRECT | GO:0043066~negative regulation of apoptotic process                                      | 6     | 3.41  | 18667, 12223, 11539, 21410, 20466, 15937                                                                                                                                                                                                                         | 0.4651 | 1.331           |
| GOTERM_MF_DIRECT | GO:0042803~protein homodimerization activity                                             | 8     | 4.55  | 18211, 20437, 13807, 12723, 21410, 15519, 75580, 14362                                                                                                                                                                                                           | 0.4674 | 1.232           |
| GOTERM_CC_DIRECT | GO:0005622~intracellular                                                                 | 14    | 7.95  | 56525, 18752, 142688, 14764, 208228, 11552, 76742, 18739, 269224, 13807, 18759, 15519, 19340, 19338                                                                                                                                                              | 0.4768 | 1.118           |
| UP_KEYWORDS      | Immunoglobulin domain                                                                    | 5     | 2.84  | 18211, 98733, 382551, 207683, 11790                                                                                                                                                                                                                              | 0.4786 | 1.395           |
| GOTERM_BP_DIRECT | GO:0045892~negative regulation of transcription, DNA-templated                           | 6     | 3.41  | 76022, 12394, 20466, 75580, 14362, 19416                                                                                                                                                                                                                         | 0.4850 | 1.301           |
| INTERPRO         | IPR003961:Fibronectin, type III                                                          | 3     | 1.70  | 60504, 98733, 11790                                                                                                                                                                                                                                              | 0.4861 | 1.830           |
| GOTERM_BP_DIRECT | GO:0005975~carbohydrate metabolic process                                                | 3     | 1.70  | 218271, 110173, 109685                                                                                                                                                                                                                                           | 0.4864 | 1.829           |
| GOTERM_MF_DIRECT | GO:0000287~magnesium ion binding                                                         | 3     | 1.70  | 13807, 105663, 213484                                                                                                                                                                                                                                            | 0.4875 | 1.825           |
| GOTERM_CC_DIRECT | GO:0005856~cytoskeleton                                                                  | 10    | 5.68  | 54721, 214459, 68166, 14260, 140917, 406220, 68524, 20392, 432611, 13998                                                                                                                                                                                         | 0.5018 | 1.147           |
| UP_SEQ_FEATURE   | active site:Proton donor                                                                 | 3     | 1.70  | 110173, 13807, 109685                                                                                                                                                                                                                                            | 0.5040 | 1.769           |
| UP_KEYWORDS      | Signal                                                                                   | 35    | 19.89 | 17313, 60504, 381924, 13642, 20452, 224024, 16399, 12837, 18647, 382551, 16402, 217219, 17388, 207683, 72555, 23794, 13089, 98170, 244058, 243168, 100043125, 110173, 12842, 73833, 12223, 17183, 73182, 18211, 18214, 11504, 12558, 20969, 20392, 109685, 14362 | 0.5041 | 1.034           |
| KEGG_PATHWAY     | mmu05016:Huntington's disease                                                            | 3     | 1.70  | 20466, 13385, 432611                                                                                                                                                                                                                                             | 0.5082 | 1.746           |
| UP_SEQ_FEATURE   | domain:PH                                                                                | 3     | 1.70  | 208177, 67220, 384783                                                                                                                                                                                                                                            | 0.5117 | 1.744           |
| GOTERM_BP_DIRECT | GO:0000122~negative regulation of transcription from RNA polymerase II promoter          | 7     | 3.98  | 17192, 21410, 210719, 13435, 20466, 18767, 75580                                                                                                                                                                                                                 | 0.5190 | 1.206           |
| GOTERM_CC_DIRECT | GO:0043231~intracellular membrane-bounded organelle                                      | 7     | 3.98  | 53414, 320150, 13089, 12394, 244059, 353282, 12837                                                                                                                                                                                                               | 0.5322 | 1.190           |
| GOTERM_BP_DIRECT | GO:0045944~positive regulation of transcription from RNA polymerase II promoter          | 9     | 5.11  | 18667, 80288, 21770, 17974, 21410, 210719, 12394, 20466, 244058                                                                                                                                                                                                  | 0.5326 | 1.136           |
| GOTERM_MF_DIRECT | GO:0000977~RNA polymerase II regulatory region sequence-specific DNA binding             | 3     | 1.70  | 21410, 12394, 75580                                                                                                                                                                                                                                              | 0.5355 | 1.668           |
| GOTERM_BP_DIRECT | GO:0006355~regulation of transcription, DNA-templated                                    | 19    | 10.80 | 56525, 80288, 73569, 30946, 21410, 319758, 384452, 210719, 20466, 17192, 18667, 76022, 67959, 93691, 244059, 12394, 13435, 75580, 353282                                                                                                                         | 0.5404 | 1.047           |
| GOTERM_CC_DIRECT | GO:0005654~nucleoplasm                                                                   | 16    | 9.09  |                                                                                                                                                                                                                                                                  | 0.5462 | 1.056           |
|                  |                                                                                          |       |       | 17347, 80288, 67684, 76742, 21410, 105203, 20466, 17192, 67959, 76156, 15519, 244059, 12394, 13435, 224742, 353282                                                                                                                                               |        |                 |
| UP_KEYWORDS      | Neurogenesis                                                                             | 3     | 1.70  | 18211, 14432, 13642                                                                                                                                                                                                                                              | 0.5482 | 1.630           |
| KEGG_PATHWAY     | mmu01130:Biosynthesis of antibiotics                                                     | 3     | 1.70  | 319554, 13807, 21991                                                                                                                                                                                                                                             | 0.5503 | 1.615           |
| KEGG_PATHWAY     | mmu04015:Rap1 signaling pathway                                                          | 3     | 1.70  | 18752, 18759, 16399                                                                                                                                                                                                                                              | 0.5503 | 1.615           |
| INTERPRO         | IPR027417:P-loop containing nucleoside triphosphate hydrolase                            | 8     | 4.55  | 244059, 233001, 19340, 13385, 224742, 19338, 19416, 53310                                                                                                                                                                                                        | 0.5570 | 1.133           |
| GOTERM_MF_DIRECT | GO:0000978~RNA polymerase II core promoter proximal region sequence-specific DNA binding | 4     | 2.27  | 17192, 18667, 319758, 210719                                                                                                                                                                                                                                     | 0.5574 | 1.369           |
| GOTERM_BP_DIRECT | GO:0001525~angiogenesis                                                                  | 3     | 1.70  | 11552, 13642, 12837                                                                                                                                                                                                                                              | 0.5661 | 1.576           |
| UP_KEYWORDS      | Receptor                                                                                 | 20    | 11.36 | 60504, 11552, 381924, 258595, 11539, 384783, 224024, 16399, 17826, 140792, 18211, 239845, 14764, 18667, 18214, 16402, 170813, 382551, 207683, 14362                                                                                                              | 0.5705 | 1.027           |
| GOTERM_BP_DIRECT | GO:0007399~nervous system development                                                    | 4     | 2.27  | 18211, 14432, 13642, 53310                                                                                                                                                                                                                                       | 0.5758 | 1.332           |
| UP_SEQ_FEATURE   | propeptide:Removed in mature form                                                        | 3     | 1.70  | 12223, 244058, 19416                                                                                                                                                                                                                                             | 0.5847 | 1.524           |
| GOTERM_BP_DIRECT | GO:0008285~negative regulation of cell proliferation                                     | 4     | 2.27  | 18211, 11539, 12394, 56812                                                                                                                                                                                                                                       | 0.5884 | 1.308           |
| GOTERM_MF_DIRECT | GO:0046982~protein heterodimerization activity                                           | 5     | 2.84  | 381924, 13807, 11539, 21410, 14362                                                                                                                                                                                                                               | 0.6002 | 1.195           |
| GOTERM_MF_DIRECT | GO:0005525~GTP binding                                                                   | 4     | 2.27  | 15519, 19340, 19338, 19416                                                                                                                                                                                                                                       | 0.6014 | 1.283           |
| GOTERM_MF_DIRECT | GO:0004871~signal transducer activity                                                    | 6     | 3.41  | 14764, 239845, 320150, 11539, 384783, 14362                                                                                                                                                                                                                      | 0.6048 | 1.138           |
| GOTERM_BP_DIRECT | GO:0045087~innate immune response                                                        | 4     | 2.27  | 54721, 15957, 83813, 54445                                                                                                                                                                                                                                       | 0.6161 | 1.256           |
| GOTERM_BP_DIRECT | GO:0010629~negative regulation of gene expression                                        | 3     | 1.70  | 50918, 18667, 353282                                                                                                                                                                                                                                             | 0.6225 | 1.422           |



## Supplemental File 3. Continuation.

| Category         | Term                                                                    | Count | %    | Genes                                                                                        | PValue | Fold Enrichment |
|------------------|-------------------------------------------------------------------------|-------|------|----------------------------------------------------------------------------------------------|--------|-----------------|
| UP_SEQ_FEATURE   | compositionally biased region:Ser-rich                                  | 4     | 2.27 | 208177, 75956, 12558, 232664                                                                 | 0.6248 | 1.240           |
| GOTERM_BP_DIRECT | GO:0008284~positive regulation of cell proliferation                    | 5     | 2.84 | 18667, 18214, 12223, 13642, 384783                                                           | 0.6248 | 1.158           |
| GOTERM_BP_DIRECT | GO:0007283~spermatogenesis                                              | 4     | 2.27 | 195434, 75571, 20437, 13435                                                                  | 0.6279 | 1.234           |
| UP_KEYWORDS      | Signal-anchor                                                           | 4     | 2.27 | 218271, 140792, 20452, 15937                                                                 | 0.6343 | 1.223           |
| INTERPRO         | IPR012677:Nucleotide-binding, alpha-beta plait                          | 3     | 1.70 | 67959, 140486, 30946                                                                         | 0.6410 | 1.374           |
| KEGG_PATHWAY     | mmu04010:MAPK signaling pathway                                         | 3     | 1.70 | 18752, 17347, 18211                                                                          | 0.6423 | 1.366           |
| GOTERM_BP_DIRECT | GO:0006974~cellular response to DNA damage stimulus                     | 4     | 2.27 | 140917, 16882, 244059, 75580                                                                 | 0.6490 | 1.196           |
| GOTERM_CC_DIRECT | GO:0005789~endoplasmic reticulum membrane                               | 6     | 3.41 | 77254, 94232, 18739, 54445, 98170, 12794                                                     | 0.6516 | 1.079           |
| UP_SEQ_FEATURE   | repeat:LRR 2                                                            | 3     | 1.70 | 18211, 232664, 233001                                                                        | 0.6613 | 1.324           |
| UP_SEQ_FEATURE   | repeat:LRR 1                                                            | 3     | 1.70 | 18211, 232664, 233001                                                                        | 0.6613 | 1.324           |
| INTERPRO         | IPR013083:Zinc finger, RING/FYVE/PHD-type                               | 4     | 2.27 | 68166, 20437, 66089, 13998                                                                   | 0.6711 | 1.157           |
| UP_KEYWORDS      | Activator                                                               | 5     | 2.84 | 80288, 93691, 21410, 12394, 224742                                                           | 0.6825 | 1.075           |
| UP_KEYWORDS      | Cytoskeleton                                                            | 8     | 4.55 | 214459, 68166, 14260, 140917, 68524, 20392, 432611, 13998                                    | 0.6870 | 1.001           |
| UP_SEQ_FEATURE   | sequence variant                                                        | 4     | 2.27 | 17183, 60504, 21410, 384452                                                                  | 0.6883 | 1.127           |
| KEGG_PATHWAY     | mmu04144:Endocytosis                                                    | 3     | 1.70 | 18211, 68524, 18759                                                                          | 0.6933 | 1.243           |
| UP_KEYWORDS      | Apoptosis                                                               | 4     | 2.27 | 17347, 67959, 70310, 20437                                                                   | 0.7053 | 1.098           |
| KEGG_PATHWAY     | mmu04080:Neuroactive ligand-receptor interaction                        | 3     | 1.70 | 239845, 11552, 11539                                                                         | 0.7065 | 1.213           |
| GOTERM_BP_DIRECT | GO:0008152~metabolic process                                            | 4     | 2.27 | 16890, 110173, 21991, 109685                                                                 | 0.7128 | 1.085           |
| GOTERM_CC_DIRECT | GO:0030529~intracellular ribonucleoprotein complex                      | 3     | 1.70 | 67959, 140486, 233863                                                                        | 0.7144 | 1.197           |
| GOTERM_MF_DIRECT | GO:0003700~transcription factor activity, sequence-specific DNA binding | 7     | 3.98 | 18667, 93691, 21410, 319758, 17355, 12394, 20466                                             | 0.7242 | 0.974           |
| UP_KEYWORDS      | Zinc-finger                                                             | 11    | 6.25 | 56525, 18752, 18667, 93691, 20437, 16882, 18759, 13435, 75580, 66089, 13998                  | 0.7301 | 0.943           |
| GOTERM_CC_DIRECT | GO:0005694~chromosome                                                   | 3     | 1.70 | 17192, 140917, 75580                                                                         | 0.7510 | 1.113           |
| INTERPRO         | IPR016024:Armadillo-type fold                                           | 3     | 1.70 | 21770, 11766, 76813                                                                          | 0.7611 | 1.091           |
| GOTERM_CC_DIRECT | GO:0005887~integral component of plasma membrane                        | 8     | 4.55 | 18211, 14764, 11552, 18214, 17388, 12737, 12723, 20392                                       | 0.7797 | 0.907           |
| GOTERM_BP_DIRECT | GO:0016567~protein ubiquitination                                       | 3     | 1.70 | 142688, 12703, 20437                                                                         | 0.7837 | 1.041           |
| GOTERM_BP_DIRECT | GO:0006810~transport                                                    | 13    | 7.39 | 140486, 76742, 68166, 18739, 16592, 228368, 19338, 12794, 72055, 11766, 12723, 252903, 19340 | 0.7879 | 0.896           |
| UP_KEYWORDS      | Immunity                                                                | 3     | 1.70 | 15957, 382551, 54445                                                                         | 0.8002 | 1.004           |
| GOTERM_MF_DIRECT | GO:0016787~hydrolase activity                                           | 11    | 6.25 | 319554, 16890, 110173, 11504, 140917, 17388, 23794, 109685, 105663, 244059, 213484           | 0.8033 | 0.882           |
| UP_KEYWORDS      | Chromosome                                                              | 3     | 1.70 | 17192, 140917, 75580                                                                         | 0.8090 | 0.984           |
| GOTERM_BP_DIRECT | GO:0002376~immune system process                                        | 3     | 1.70 | 15957, 382551, 54445                                                                         | 0.8095 | 0.984           |
| GOTERM_MF_DIRECT | GO:0019899~enzyme binding                                               | 3     | 1.70 | 18667, 12558, 70827                                                                          | 0.8202 | 0.960           |
| GOTERM_BP_DIRECT | GO:0006357~regulation of transcription from RNA polymerase II promoter  | 3     | 1.70 | 30946, 319758, 70827                                                                         | 0.8251 | 0.949           |
| UP_KEYWORDS      | RNA-binding                                                             | 4     | 2.27 | 15957, 67959, 140486, 30946                                                                  | 0.8258 | 0.893           |
| GOTERM_BP_DIRECT | GO:0006915~apoptotic process                                            | 4     | 2.27 | 17347, 67959, 70310, 20437                                                                   | 0.8329 | 0.881           |
| GOTERM_CC_DIRECT | GO:0005615~extracellular space                                          | 10    | 5.68 | 17313, 16890, 12842, 110173, 12223, 13807, 21991, 23794, 12349, 53310                        | 0.8361 | 0.849           |
| UP_KEYWORDS      | Transport                                                               | 12    | 6.82 | 140486, 76742, 68166, 18739, 228368, 16592, 72055, 11766, 12723, 252903, 19340, 19338        | 0.8421 | 0.847           |
| GOTERM_BP_DIRECT | GO:0006508~proteolysis                                                  | 4     | 2.27 | 74616, 11504, 17388, 23794                                                                   | 0.8432 | 0.863           |
| INTERPRO         | IPR007110:immunoglobulin-like domain                                    | 6     | 3.41 | 100043125, 18211, 98733, 382551, 207683, 11790                                               | 0.8434 | 0.839           |
| GOTERM_CC_DIRECT | GO:0005813~centrosome                                                   | 3     | 1.70 | 98733, 140917, 73047                                                                         | 0.8555 | 0.881           |
| INTERPRO         | IPR013783:immunoglobulin-like fold                                      | 7     | 3.98 | 100043125, 60504, 18211, 98733, 382551, 207683, 11790                                        | 0.8574 | 0.820           |
| UP_KEYWORDS      | Endoplasmic reticulum                                                   | 6     | 3.41 | 94232, 18739, 17974, 54445, 98170, 12794                                                     | 0.8661 | 0.808           |
| UP_KEYWORDS      | Hydrolase                                                               | 10    | 5.68 | 16890, 110173, 11504, 140917, 17388, 23794, 109685, 105663, 244059, 213484                   | 0.8677 | 0.815           |
| UP_SEQ_FEATURE   | topological domain:Lumenal                                              | 3     | 1.70 | 218271, 320150, 20452                                                                        | 0.8692 | 0.849           |
| GOTERM_BP_DIRECT | GO:0007165~signal transduction                                          | 8     | 4.55 | 14764, 239845, 76742, 21770, 11539, 384783, 14362, 19416                                     | 0.8751 | 0.800           |
| KEGG_PATHWAY     | mmu01100:Metabolic pathways                                             | 9     | 5.11 | 319554, 218271, 13807, 21991, 13089, 109685, 70827, 13435, 105663                            | 0.8758 | 0.811           |
| GOTERM_MF_DIRECT | GO:0003723~RNA binding                                                  | 5     | 2.84 | 15957, 67959, 140486, 30946, 20466                                                           | 0.8806 | 0.788           |
| UP_KEYWORDS      | Secreted                                                                | 10    | 5.68 | 17183, 243168, 17313, 12842, 11504, 12223, 20969, 23794, 109685, 12837                       | 0.8844 | 0.796           |
| GOTERM_MF_DIRECT | GO:0043565~sequence-specific DNA binding                                | 4     | 2.27 | 18667, 21410, 210719, 75580                                                                  | 0.8902 | 0.776           |
| GOTERM_MF_DIRECT | GO:0003682~chromatin binding                                            | 3     | 1.70 | 17192, 13435, 20466                                                                          | 0.8939 | 0.791           |
| GOTERM_MF_DIRECT | GO:0005509~calcium ion binding                                          | 4     | 2.27 | 17183, 17313, 17388, 12558                                                                   | 0.9254 | 0.703           |
| INTERPRO         | IPR013106:immunoglobulin V-set                                          | 3     | 1.70 | 100043125, 382551, 207683                                                                    | 0.9301 | 0.697           |
| GOTERM_CC_DIRECT | GO:0005576~extracellular region                                         | 10    | 5.68 | 17183, 243168, 17313, 12842, 11504, 12223, 20969, 23794, 109685, 12837                       | 0.9359 | 0.728           |
| UP_KEYWORDS      | Cell cycle                                                              | 3     | 1.70 | 18647, 20437, 16882                                                                          | 0.9482 | 0.643           |
| UP_KEYWORDS      | Ubl conjugation pathway                                                 | 3     | 1.70 | 142688, 12703, 20437                                                                         | 0.9498 | 0.638           |
| UP_KEYWORDS      | Oxidoreductase                                                          | 3     | 1.70 | 243168, 13089, 22628                                                                         | 0.9523 | 0.630           |
| GOTERM_BP_DIRECT | GO:0007049~cell cycle                                                   | 3     | 1.70 | 18647, 20437, 16882                                                                          | 0.9574 | 0.614           |
| GOTERM_CC_DIRECT | GO:0005739~mitochondrion                                                | 9     | 5.11 | 319554, 16890, 18667, 70310, 16882, 232664, 70827, 15937, 19340                              | 0.9631 | 0.668           |
| GOTERM_MF_DIRECT | GO:0003676~nucleic acid binding                                         | 6     | 3.41 | 56525, 93691, 67959, 140486, 230761, 75580                                                   | 0.9751 | 0.596           |
| UP_KEYWORDS      | Transducer                                                              | 7     | 3.98 | 14764, 239845, 11552, 258595, 11539, 384783, 14362                                           | 0.9933 | 0.522           |
| UP_KEYWORDS      | G-protein coupled receptor                                              | 6     | 3.41 | 14764, 239845, 11552, 258595, 11539, 14362                                                   | 0.9970 | 0.462           |
| GOTERM_BP_DIRECT | GO:0007186~G-protein coupled receptor signaling pathway                 | 6     | 3.41 | 14764, 239845, 11552, 258595, 11539, 14362                                                   | 0.9982 | 0.442           |
| INTERPRO         | IPR000276:G-protein-coupled receptor, rhodopsin-like                    | 4     | 2.27 | 14764, 11552, 258595, 11539                                                                  | 0.9993 | 0.353           |
| GOTERM_MF_DIRECT | GO:0004930~G-protein coupled receptor activity                          | 5     | 2.84 | 14764, 239845, 258595, 11539, 14362                                                          | 0.9997 | 0.351           |
| INTERPRO         | IPR017452:GPCR, rhodopsin-like, 7TM                                     | 4     | 2.27 | 14764, 11552, 258595, 11539                                                                  | 0.9999 | 0.301           |

**Supplemental File 4.**

**Functional terms not clustered during pathway enrichment analysis of Downregulated genes.**

| Category         | Term                                                                                        | Count | %     | Genes                                                                                                                                                                                                                                                                                                                                                                                                               | PValue | Fold Enrichment |
|------------------|---------------------------------------------------------------------------------------------|-------|-------|---------------------------------------------------------------------------------------------------------------------------------------------------------------------------------------------------------------------------------------------------------------------------------------------------------------------------------------------------------------------------------------------------------------------|--------|-----------------|
| UP_KEYWORDS      | Lipoprotein                                                                                 | 14    | 9.33  | 19342, 106042, 14429, 170638, 67168, 24013, 23912, 14360, 110265, 22421, 13518, 14681, 14701, 110855                                                                                                                                                                                                                                                                                                                | 0.001  | 2.971           |
| UP_KEYWORDS      | Prenylation                                                                                 | 6     | 4.00  | 19342, 106042, 24013, 23912, 14701, 110855                                                                                                                                                                                                                                                                                                                                                                          | 0.003  | 6.327           |
| UP_KEYWORDS      | Zinc                                                                                        | 24    | 16.00 | 331374, 107823, 100233208, 100041433, 20182, 70081, 433520, 241073, 17764, 106042, 112415, 16876, 22380, 56490, 170753, 74042, 328274, 227059, 67785, 68350, 18105, 433791, 19415, 30791                                                                                                                                                                                                                            | 0.003  | 1.893           |
| INTERPRO         | IPR007087:Zinc finger, C2H2                                                                 | 12    | 8.00  | 110593, 112415, 170753, 56490, 74042, 328274, 100233208, 100041433, 70081, 433791, 433520, 17764                                                                                                                                                                                                                                                                                                                    | 0.005  | 2.662           |
| UP_KEYWORDS      | Zinc-finger                                                                                 | 19    | 12.67 | 331374, 107823, 100233208, 100041433, 20182, 70081, 241073, 433520, 17764, 112415, 22380, 56490, 170753, 74042, 328274, 67785, 68350, 433791, 19415                                                                                                                                                                                                                                                                 | 0.006  | 2.010           |
| UP_KEYWORDS      | Glycoprotein                                                                                | 35    | 23.33 | 14254, 14172, 257630, 103963, 73382, 52020, 60505, 18208, 67374, 72043, 13406, 212114, 13838, 20499, 56693, 214523, 67168, 104099, 19128, 74488, 227059, 22421, 63959, 85031, 71844, 108115, 22352, 12164, 74048, 76943, 15247, 14429, 12519, 14365, 268934                                                                                                                                                         | 0.010  | 1.519           |
| UP_KEYWORDS      | Metal-binding                                                                               | 32    | 21.33 | 107823, 100233208, 100041433, 20182, 70081, 241073, 17764, 72043, 18570, 106042, 16876, 170638, 170753, 13086, 104099, 67785, 50770, 68350, 14681, 18105, 19415, 331374, 13518, 433520, 112415, 22380, 56490, 74042, 328274, 14360, 433791, 110855                                                                                                                                                                  | 0.010  | 1.560           |
| GOTERM_BP_DIRECT | GO:0050770~regulation of axonogenesis                                                       | 3     | 2.00  | 13838, 22421, 22352                                                                                                                                                                                                                                                                                                                                                                                                 | 0.015  | 16.011          |
| GOTERM_BP_DIRECT | GO:0051216~cartilage development                                                            | 4     | 2.67  | 12164, 257630, 22421, 72043                                                                                                                                                                                                                                                                                                                                                                                         | 0.017  | 7.290           |
| UP_KEYWORDS      | Myristate                                                                                   | 5     | 3.33  | 170638, 14360, 110265, 13518, 14681                                                                                                                                                                                                                                                                                                                                                                                 | 0.020  | 4.812           |
| UP_SEQ_FEATURE   | domain:SH3                                                                                  | 5     | 3.33  | 19342, 52906, 14360, 320664, 13518                                                                                                                                                                                                                                                                                                                                                                                  | 0.021  | 4.759           |
| UP_SEQ_FEATURE   | compositionally biased region:Poly-Lys                                                      | 5     | 3.33  | 15247, 106042, 22380, 52906, 57752                                                                                                                                                                                                                                                                                                                                                                                  | 0.021  | 4.759           |
| UP_KEYWORDS      | Alternative splicing                                                                        | 40    | 26.67 | 107823, 257630, 320664, 52020, 20182, 72776, 67434, 18570, 329251, 74211, 142687, 13838, 20499, 16876, 12695, 235633, 52906, 67785, 63959, 68350, 14681, 71844, 72685, 66609, 108115, 110265, 13518, 106347, 541610, 215351, 56490, 74042, 70461, 622554, 50493, 14360, 12519, 57752, 110855, 268934                                                                                                                | 0.022  | 1.386           |
| INTERPRO         | IPR001909:Krueppel-associated box                                                           | 7     | 4.67  | 112415, 328274, 100233208, 100041433, 70081, 433791, 433520                                                                                                                                                                                                                                                                                                                                                         | 0.027  | 3.043           |
| UP_SEQ_FEATURE   | signal peptide                                                                              | 29    | 19.33 | 14254, 14172, 257630, 103963, 73382, 52020, 60505, 18208, 67374, 72043, 13406, 212114, 19342, 13838, 56693, 19128, 74488, 227059, 22421, 85031, 106347, 541610, 12164, 74048, 76943, 228413, 12519, 14365, 268934                                                                                                                                                                                                   | 0.028  | 1.467           |
| GOTERM_CC_DIRECT | GO:0005622~intracellular                                                                    | 18    | 12.00 | 331374, 66399, 100233208, 100041433, 60505, 70081, 433520, 19342, 142687, 112415, 170638, 27263, 328274, 23912, 74488, 433791, 19415, 268934                                                                                                                                                                                                                                                                        | 0.028  | 1.729           |
| GOTERM_BP_DIRECT | GO:0007169~transmembrane receptor protein tyrosine kinase signaling pathway                 | 4     | 2.67  | 14254, 13838, 52906, 14360                                                                                                                                                                                                                                                                                                                                                                                          | 0.029  | 5.978           |
| UP_SEQ_FEATURE   | glycosylation site:N-linked (GlcNAc...)                                                     | 32    | 21.33 | 14254, 14172, 257630, 103963, 73382, 52020, 60505, 18208, 67374, 72043, 13406, 212114, 13838, 20499, 56693, 214523, 67168, 19128, 74488, 227059, 22421, 63959, 85031, 108115, 12164, 74048, 76943, 15247, 14429, 12519, 14365, 268934                                                                                                                                                                               | 0.030  | 1.419           |
| UP_SEQ_FEATURE   | lipid moiety-binding region:S-geranylgeranyl cysteine                                       | 4     | 2.67  | 19342, 23912, 14701, 110855                                                                                                                                                                                                                                                                                                                                                                                         | 0.032  | 5.745           |
| GOTERM_BP_DIRECT | GO:0046777~protein autophosphorylation                                                      | 5     | 3.33  | 14254, 13838, 24013, 14360, 22241                                                                                                                                                                                                                                                                                                                                                                                   | 0.034  | 4.083           |
| GOTERM_BP_DIRECT | GO:0007409~axonogenesis                                                                     | 4     | 2.67  | 18223, 22241, 18208, 13518                                                                                                                                                                                                                                                                                                                                                                                          | 0.034  | 5.586           |
| SMART            | SM00349:KRAB                                                                                | 7     | 4.67  | 112415, 328274, 100233208, 100041433, 70081, 433791, 433520                                                                                                                                                                                                                                                                                                                                                         | 0.038  | 2.762           |
| GOTERM_CC_DIRECT | GO:0055037~recycling endosome                                                               | 4     | 2.67  | 19342, 78670, 55943, 50770                                                                                                                                                                                                                                                                                                                                                                                          | 0.039  | 5.297           |
| REACTOME_PATHWAY | R-MMU-202733:R-MMU-202733                                                                   | 3     | 2.00  | 14360, 19128, 67374                                                                                                                                                                                                                                                                                                                                                                                                 | 0.043  | 8.912           |
| UP_SEQ_FEATURE   | splice variant                                                                              | 39    | 26.00 | 107823, 257630, 320664, 52020, 20182, 72776, 78748, 67434, 329251, 74211, 142687, 13838, 20499, 16876, 12695, 235633, 52906, 67785, 63959, 68350, 14681, 71844, 72685, 66609, 108115, 13518, 106347, 541610, 215351, 74222, 56490, 74042, 70461, 50493, 14360, 12519, 57752, 110855, 268934                                                                                                                         | 0.044  | 1.314           |
| UP_KEYWORDS      | Phosphoprotein                                                                              | 56    | 37.33 | 107823, 320664, 55943, 17135, 69871, 19342, 329251, 74211, 16549, 170753, 18223, 20382, 52906, 20957, 227059, 63959, 19415, 15526, 16572, 108115, 223739, 22352, 22380, 56490, 70461, 233011, 14254, 19265, 66399, 72776, 17764, 13406, 67434, 106042, 13838, 20499, 12695, 24013, 67785, 22241, 50770, 71844, 18105, 72685, 13518, 106347, 215351, 74048, 74042, 228413, 50493, 14360, 57752, 68510, 223453, 14701 | 0.056  | 1.217           |
| GOTERM_BP_DIRECT | GO:006979~response to oxidative stress                                                      | 4     | 2.67  | 331374, 50493, 110265, 17764                                                                                                                                                                                                                                                                                                                                                                                        | 0.059  | 4.494           |
| GOTERM_CC_DIRECT | GO:0031965~nuclear membrane                                                                 | 5     | 3.33  | 18570, 106042, 74042, 71844, 68510                                                                                                                                                                                                                                                                                                                                                                                  | 0.059  | 3.398           |
| INTERPRO         | IPR020846:Major facilitator superfamily domain                                              | 4     | 2.67  | 228993, 15247, 108115, 63959                                                                                                                                                                                                                                                                                                                                                                                        | 0.061  | 4.443           |
| UP_KEYWORDS      | Nucleotide-binding                                                                          | 17    | 11.33 | 16572, 14254, 331374, 74222, 19342, 13838, 76889, 27263, 24013, 23912, 14360, 50770, 22241, 14681, 233011, 110855, 15526                                                                                                                                                                                                                                                                                            | 0.061  | 1.605           |
| UP_KEYWORDS      | Signal                                                                                      | 36    | 24.00 | 14254, 19265, 14172, 257630, 103963, 73382, 52020, 60505, 18208, 628185, 67374, 72043, 13406, 212114, 13838, 56693, 241589, 104099, 19128, 74488, 227059, 22421, 85031, 30791, 106347, 541610, 12164, 74048, 76943, 56490, 93708, 228413, 12519, 14365, 629761, 268934                                                                                                                                              | 0.063  | 1.312           |
| GOTERM_CC_DIRECT | GO:0005768~endosome                                                                         | 8     | 5.33  | 18570, 19342, 14254, 13838, 14360, 55943, 50770, 225861                                                                                                                                                                                                                                                                                                                                                             | 0.063  | 2.259           |
| UP_KEYWORDS      | Kinase                                                                                      | 9     | 6.00  | 14254, 13838, 76889, 331374, 27263, 24013, 14360, 22241, 233011                                                                                                                                                                                                                                                                                                                                                     | 0.063  | 2.107           |
| KEGG_PATHWAY     | mmu04014:Ras signaling pathway                                                              | 5     | 3.33  | 14254, 14172, 85031, 14701, 19415                                                                                                                                                                                                                                                                                                                                                                                   | 0.064  | 3.242           |
| REACTOME_PATHWAY | R-MMU-1257604:R-MMU-1257604                                                                 | 3     | 2.00  | 14172, 14360, 12519                                                                                                                                                                                                                                                                                                                                                                                                 | 0.068  | 6.855           |
| GOTERM_CC_DIRECT | GO:0005884~actin filament                                                                   | 3     | 2.00  | 21916, 14360, 14701                                                                                                                                                                                                                                                                                                                                                                                                 | 0.072  | 6.777           |
| GOTERM_BP_DIRECT | GO:0007165~signal transduction                                                              | 14    | 9.33  | 14172, 78748, 329251, 170638, 67168, 24013, 22421, 22241, 14365, 14681, 14701, 19415, 268934, 110855                                                                                                                                                                                                                                                                                                                | 0.073  | 1.667           |
| GOTERM_BP_DIRECT | GO:0006919~activation of cysteine-type endopeptidase activity involved in apoptotic process | 3     | 2.00  | 18570, 68350, 223453                                                                                                                                                                                                                                                                                                                                                                                                | 0.073  | 6.691           |
| GOTERM_BP_DIRECT | GO:0007411~axon guidance                                                                    | 4     | 2.67  | 16572, 13838, 14360, 18208                                                                                                                                                                                                                                                                                                                                                                                          | 0.077  | 4.012           |
| KEGG_PATHWAY     | mmu04390:Hippo signaling pathway                                                            | 4     | 2.67  | 12164, 12695, 22421, 14365                                                                                                                                                                                                                                                                                                                                                                                          | 0.077  | 3.933           |
| UP_KEYWORDS      | Cell membrane                                                                               | 30    | 20.00 | 14254, 52020, 628185, 241073, 67374, 19342, 13838, 20499, 12695, 259111, 67168, 258713, 50770, 63959, 14681, 30791, 108115, 13518, 106347, 74048, 76889, 14429, 93708, 23912, 258604, 14360, 14365, 14701, 268934, 110855                                                                                                                                                                                           | 0.087  | 1.321           |
| GOTERM_MF_DIRECT | GO:0046872~metal ion binding                                                                | 30    | 20.00 | 107823, 100233208, 100041433, 20182, 70081, 241073, 17764, 72043, 18570, 106042, 16876, 170638, 170753, 104099, 67785, 50770, 68350, 14681, 18105, 19415, 13518, 433520, 110593, 112415, 22380, 56490, 328274, 14360, 433791, 110855                                                                                                                                                                                | 0.089  | 1.311           |
| GOTERM_CC_DIRECT | GO:0030424~axon                                                                             | 6     | 4.00  | 16572, 13838, 75785, 14365, 68350, 22352                                                                                                                                                                                                                                                                                                                                                                            | 0.092  | 2.491           |
| GOTERM_MF_DIRECT | GO:0032403~protein complex binding                                                          | 6     | 4.00  | 16572, 56693, 14360, 19128, 22241, 14681                                                                                                                                                                                                                                                                                                                                                                            | 0.096  | 2.457           |
| UP_SEQ_FEATURE   | domain:Protein kinase                                                                       | 7     | 4.67  | 14254, 13838, 76889, 27263, 24013, 14360, 22241                                                                                                                                                                                                                                                                                                                                                                     | 0.096  | 2.203           |
| GOTERM_BP_DIRECT | GO:0008104~protein localization                                                             | 3     | 2.00  | 16572, 235633, 22241                                                                                                                                                                                                                                                                                                                                                                                                | 0.097  | 5.675           |
| UP_SEQ_FEATURE   | lipid moiety-binding region:S-palmitoyl cysteine                                            | 4     | 2.67  | 14429, 67168, 14360, 14681                                                                                                                                                                                                                                                                                                                                                                                          | 0.103  | 3.531           |
| KEGG_PATHWAY     | mmu04144:Endocytosis                                                                        | 5     | 3.33  | 72685, 16572, 14254, 24013, 225861                                                                                                                                                                                                                                                                                                                                                                                  | 0.110  | 2.670           |
| UP_KEYWORDS      | Palmitate                                                                                   | 5     | 3.33  | 14429, 67168, 14360, 13518, 14681                                                                                                                                                                                                                                                                                                                                                                                   | 0.111  | 2.723           |
| GOTERM_BP_DIRECT | GO:0030900~forebrain development                                                            | 3     | 2.00  | 18223, 14360, 14681                                                                                                                                                                                                                                                                                                                                                                                                 | 0.112  | 5.213           |

## Supplemental File 4. Continuation.

| Category         | Term                                                             | Count | %     | Genes                                                                                                                                                                                                                                                                                                                                                                       | PValue | Fold Enrichment |
|------------------|------------------------------------------------------------------|-------|-------|-----------------------------------------------------------------------------------------------------------------------------------------------------------------------------------------------------------------------------------------------------------------------------------------------------------------------------------------------------------------------------|--------|-----------------|
| GOTERM_BP_DIRECT | GO:0016310~phosphorylation                                       | 8     | 5.33  | 14254, 13838, 76889, 27263, 24013, 14360, 22241, 233011                                                                                                                                                                                                                                                                                                                     | 0.113  | 1.953           |
| UP_KEYWORDS      | Disulfide bond                                                   | 25    | 16.67 | 14254, 257630, 14172, 108115, 73382, 52020, 18208, 60505, 106347, 67374, 12164, 74048, 76943, 214523, 14429, 67168, 228413, 50493, 104099, 19128, 12519, 22421, 14365, 85031, 268934                                                                                                                                                                                        | 0.119  | 1.325           |
| KEGG_PATHWAY     | mmu05200:Pathways in cancer                                      | 6     | 4.00  | 14172, 67168, 22421, 14365, 20182, 14701                                                                                                                                                                                                                                                                                                                                    | 0.120  | 2.244           |
| INTERPRO         | IPRO11009:Protein kinase-like domain                             | 7     | 4.67  | 14254, 13838, 76889, 27263, 24013, 14360, 22241                                                                                                                                                                                                                                                                                                                             | 0.126  | 2.042           |
| GOTERM_MF_DIRECT | GO:0031625~ubiquitin protein ligase binding                      | 5     | 3.33  | 142687, 20747, 55943, 68350, 15526                                                                                                                                                                                                                                                                                                                                          | 0.127  | 2.581           |
| UP_KEYWORDS      | SH3 domain                                                       | 4     | 2.67  | 52906, 14360, 320664, 13518                                                                                                                                                                                                                                                                                                                                                 | 0.130  | 3.184           |
| GOTERM_MF_DIRECT | GO:0003676~nucleic acid binding                                  | 13    | 8.67  | 110593, 112415, 22380, 16549, 56490, 20382, 328274, 100233208, 100041433, 70081, 433791, 433520, 17764                                                                                                                                                                                                                                                                      | 0.131  | 1.541           |
| GOTERM_BP_DIRECT | GO:0001503~ossification                                          | 3     | 2.00  | 12164, 13406, 14172                                                                                                                                                                                                                                                                                                                                                         | 0.134  | 4.670           |
| KEGG_PATHWAY     | mmu04916:Melanogenesis                                           | 3     | 2.00  | 22421, 14365, 14681                                                                                                                                                                                                                                                                                                                                                         | 0.139  | 4.499           |
| UP_SEQ_FEATURE   | nucleotide phosphate-binding region:GTP                          | 5     | 3.33  | 19342, 74222, 74211, 23912, 14681                                                                                                                                                                                                                                                                                                                                           | 0.141  | 2.476           |
| GOTERM_CC_DIRECT | GO:0044297~cell body                                             | 3     | 2.00  | 13838, 14681, 22352                                                                                                                                                                                                                                                                                                                                                         | 0.141  | 4.518           |
| UP_SEQ_FEATURE   | domain:lg-like V-type                                            | 3     | 2.00  | 12519, 106347, 67374                                                                                                                                                                                                                                                                                                                                                        | 0.147  | 4.389           |
| GOTERM_CC_DIRECT | GO:0005886~plasma membrane                                       | 38    | 25.33 | 14254, 19265, 52020, 628185, 241073, 67374, 72043, 19342, 329251, 13838, 20499, 259111, 12695, 67168, 258713, 227059, 50770, 63959, 14681, 19415, 30791, 331374, 108115, 13518, 106347, 22352, 74048, 22380, 76889, 14429, 93708, 23912, 258604, 14360, 14365, 14701, 110855, 268934                                                                                        | 0.151  | 1.198           |
| UP_SEQ_FEATURE   | lipid moiety-binding region:N-myristoyl glycine                  | 3     | 2.00  | 170638, 14360, 14681                                                                                                                                                                                                                                                                                                                                                        | 0.152  | 4.309           |
| UP_SEQ_FEATURE   | disulfide bond                                                   | 21    | 14.00 | 14254, 257630, 73382, 52020, 18208, 60505, 106347, 67374, 12164, 19342, 74048, 76943, 214523, 14429, 67168, 228413, 50493, 19128, 12519, 14365, 85031                                                                                                                                                                                                                       | 0.153  | 1.322           |
| KEGG_PATHWAY     | mmu04510:Focal adhesion                                          | 4     | 2.67  | 329251, 14254, 104099, 14360                                                                                                                                                                                                                                                                                                                                                | 0.156  | 2.869           |
| UP_SEQ_FEATURE   | binding site:ATP                                                 | 7     | 4.67  | 14254, 13838, 27263, 24013, 14360, 22241, 233011                                                                                                                                                                                                                                                                                                                            | 0.160  | 1.897           |
| KEGG_PATHWAY     | mmu04810:Regulation of actin cytoskeleton                        | 4     | 2.67  | 329251, 14172, 104099, 14701                                                                                                                                                                                                                                                                                                                                                | 0.167  | 2.775           |
| UP_KEYWORDS      | Extracellular matrix                                             | 4     | 2.67  | 13406, 56693, 22421, 18208                                                                                                                                                                                                                                                                                                                                                  | 0.168  | 2.818           |
| KEGG_PATHWAY     | mmu04725:Cholinergic synapse                                     | 3     | 2.00  | 14360, 14681, 14701                                                                                                                                                                                                                                                                                                                                                         | 0.171  | 3.941           |
| UP_SEQ_FEATURE   | compositionally biased region:Poly-Pro                           | 5     | 3.33  | 13406, 228413, 20747, 57752, 541610                                                                                                                                                                                                                                                                                                                                         | 0.172  | 2.290           |
| GOTERM_MF_DIRECT | GO:0016301~kinase activity                                       | 8     | 5.33  | 14254, 13838, 76889, 27263, 24013, 14360, 22241, 233011                                                                                                                                                                                                                                                                                                                     | 0.172  | 1.740           |
| KEGG_PATHWAY     | mmu04724:Glutamatergic synapse                                   | 3     | 2.00  | 14681, 14701, 268934                                                                                                                                                                                                                                                                                                                                                        | 0.176  | 3.873           |
| GOTERM_MF_DIRECT | GO:0005125~cytokine activity                                     | 4     | 2.67  | 12164, 257630, 22421, 60505                                                                                                                                                                                                                                                                                                                                                 | 0.177  | 2.740           |
| GOTERM_BP_DIRECT | GO:0008283~cell proliferation                                    | 4     | 2.67  | 16876, 14172, 50493, 57752                                                                                                                                                                                                                                                                                                                                                  | 0.180  | 2.717           |
| GOTERM_MF_DIRECT | GO:0005215~transporter activity                                  | 4     | 2.67  | 228993, 15247, 20499, 108115                                                                                                                                                                                                                                                                                                                                                | 0.182  | 2.702           |
| UP_SEQ_FEATURE   | topological domain:Cytoplasmic                                   | 23    | 15.33 | 14254, 103963, 52020, 55943, 106347, 67374, 74048, 15247, 13838, 214523, 20499, 14429, 67168, 228413, 74488, 12519, 50770, 63959, 14365, 68350, 268934, 215090, 30791                                                                                                                                                                                                       | 0.187  | 1.262           |
| UP_SEQ_FEATURE   | propeptide:Removed in mature form                                | 4     | 2.67  | 24013, 23912, 14701, 110855                                                                                                                                                                                                                                                                                                                                                 | 0.188  | 2.655           |
| GOTERM_MF_DIRECT | GO:0005509~calcium ion binding                                   | 8     | 5.33  | 18570, 170638, 93708, 228413, 19128, 52020, 13518, 72043                                                                                                                                                                                                                                                                                                                    | 0.195  | 1.678           |
| UP_KEYWORDS      | ATP-binding                                                      | 12    | 8.00  | 16572, 14254, 13838, 76889, 331374, 27263, 24013, 14360, 22241, 50770, 233011, 15526                                                                                                                                                                                                                                                                                        | 0.195  | 1.457           |
| UP_KEYWORDS      | Cytoskeleton                                                     | 10    | 6.67  | 74222, 78748, 16572, 21916, 23912, 52906, 320664, 57752, 13518, 72776                                                                                                                                                                                                                                                                                                       | 0.196  | 1.543           |
| GOTERM_BP_DIRECT | GO:0001764~neuron migration                                      | 3     | 2.00  | 14360, 14365, 18208                                                                                                                                                                                                                                                                                                                                                         | 0.199  | 3.615           |
| KEGG_PATHWAY     | mmu04151:PI3K-Akt signaling pathway                              | 5     | 3.33  | 14254, 14172, 67168, 104099, 14701                                                                                                                                                                                                                                                                                                                                          | 0.201  | 2.115           |
| GOTERM_CC_DIRECT | GO:0014069~postsynaptic density                                  | 4     | 2.67  | 72685, 13838, 14360, 13518                                                                                                                                                                                                                                                                                                                                                  | 0.201  | 2.571           |
| KEGG_PATHWAY     | mmu04360:Axon guidance                                           | 3     | 2.00  | 13838, 14360, 18208                                                                                                                                                                                                                                                                                                                                                         | 0.209  | 3.453           |
| GOTERM_BP_DIRECT | GO:0001525~angiogenesis                                          | 4     | 2.67  | 18570, 14254, 14172, 22421                                                                                                                                                                                                                                                                                                                                                  | 0.212  | 2.501           |
| GOTERM_BP_DIRECT | GO:0098779~mitophagy in response to mitochondrial depolarization | 3     | 2.00  | 241589, 22241, 233011                                                                                                                                                                                                                                                                                                                                                       | 0.218  | 3.396           |
| UP_KEYWORDS      | Methylation                                                      | 9     | 6.00  | 19342, 106042, 16549, 24013, 23912, 20182, 14701, 110855, 15526                                                                                                                                                                                                                                                                                                             | 0.219  | 1.552           |
| KEGG_PATHWAY     | mmu04728:Dopaminergic synapse                                    | 3     | 2.00  | 16572, 14681, 14701                                                                                                                                                                                                                                                                                                                                                         | 0.222  | 3.324           |
| INTERPRO         | IPRO17441:Protein kinase, ATP binding site                       | 5     | 3.33  | 14254, 13838, 24013, 14360, 22241                                                                                                                                                                                                                                                                                                                                           | 0.222  | 2.058           |
| GOTERM_BP_DIRECT | GO:0055085~transmembrane transport                               | 5     | 3.33  | 228993, 15247, 20499, 227059, 30791                                                                                                                                                                                                                                                                                                                                         | 0.223  | 2.053           |
| UP_KEYWORDS      | Calcium                                                          | 8     | 5.33  | 18570, 170638, 93708, 104099, 19128, 52020, 13518, 72043                                                                                                                                                                                                                                                                                                                    | 0.229  | 1.601           |
| UP_SEQ_FEATURE   | compositionally biased region:Ser-rich                           | 5     | 3.33  | 78748, 170753, 74042, 320664, 541610                                                                                                                                                                                                                                                                                                                                        | 0.229  | 2.026           |
| INTERPRO         | IPRO11992:EF-hand-like domain                                    | 4     | 2.67  | 18570, 170638, 13518, 241073                                                                                                                                                                                                                                                                                                                                                | 0.234  | 2.376           |
| KEGG_PATHWAY     | mmu04310:Wnt signaling pathway                                   | 3     | 2.00  | 106042, 22421, 14365                                                                                                                                                                                                                                                                                                                                                        | 0.239  | 3.159           |
| GOTERM_BP_DIRECT | GO:0007399~nervous system development                            | 5     | 3.33  | 13838, 14172, 18223, 14365, 17135                                                                                                                                                                                                                                                                                                                                           | 0.241  | 1.982           |
| UP_SEQ_FEATURE   | topological domain:Extracellular                                 | 18    | 12.00 | 14254, 52020, 106347, 67374, 74048, 15247, 13838, 214523, 14429, 67168, 228413, 74488, 12519, 50770, 14365, 63959, 268934, 30791                                                                                                                                                                                                                                            | 0.246  | 1.261           |
| GOTERM_CC_DIRECT | GO:0005925~focal adhesion                                        | 5     | 3.33  | 14254, 320664, 13518, 22352, 15526                                                                                                                                                                                                                                                                                                                                          | 0.247  | 1.964           |
| GOTERM_CC_DIRECT | GO:0043025~neuronal cell body                                    | 6     | 4.00  | 16572, 16549, 50493, 22241, 14365, 68350                                                                                                                                                                                                                                                                                                                                    | 0.263  | 1.726           |
| GOTERM_CC_DIRECT | GO:0016020~membrane                                              | 50    | 33.33 | 103963, 73382, 55943, 19342, 18570, 16549, 67168, 104099, 227059, 63959, 68350, 14681, 30791, 16572, 108115, 110265, 15247, 622554, 12519, 228993, 14254, 19265, 21916, 52020, 241073, 67374, 106042, 13838, 214523, 20499, 12695, 24013, 74488, 22241, 50770, 71844, 13518, 106347, 74048, 76889, 93708, 228413, 23912, 14360, 14365, 68510, 14701, 215090, 268934, 110855 | 0.268  | 1.098           |
| UP_KEYWORDS      | mRNA processing                                                  | 4     | 2.67  | 22380, 16549, 20382, 67337                                                                                                                                                                                                                                                                                                                                                  | 0.280  | 2.157           |
| UP_SEQ_FEATURE   | active site:Proton acceptor                                      | 7     | 4.67  | 14254, 13838, 27263, 24013, 50493, 14360, 22241                                                                                                                                                                                                                                                                                                                             | 0.287  | 1.558           |
| GOTERM_CC_DIRECT | GO:0043005~neuron projection                                     | 5     | 3.33  | 16572, 22241, 14681, 268934, 22352                                                                                                                                                                                                                                                                                                                                          | 0.288  | 1.829           |
| KEGG_PATHWAY     | mmu04514:Cell adhesion molecules (CAMs)                          | 3     | 2.00  | 104099, 12519, 67374                                                                                                                                                                                                                                                                                                                                                        | 0.290  | 2.749           |
| GOTERM_CC_DIRECT | GO:0005856~cytoskeleton                                          | 10    | 6.67  | 74222, 78748, 21916, 23912, 52906, 320664, 57752, 13518, 72776, 22352                                                                                                                                                                                                                                                                                                       | 0.292  | 1.380           |
| UP_KEYWORDS      | Cell adhesion                                                    | 5     | 3.33  | 13838, 93708, 104099, 320664, 13518                                                                                                                                                                                                                                                                                                                                         | 0.297  | 1.803           |
| KEGG_PATHWAY     | mmu05202:Transcriptional misregulation in cancer                 | 3     | 2.00  | 14254, 107823, 20182                                                                                                                                                                                                                                                                                                                                                        | 0.300  | 2.683           |
| GOTERM_MF_DIRECT | GO:0008270~zinc ion binding                                      | 10    | 6.67  | 106042, 107823, 66609, 16876, 22380, 74042, 67785, 68350, 20182, 241073                                                                                                                                                                                                                                                                                                     | 0.303  | 1.364           |
| REACTOME_PATHWAY | R-MMU-72163:R-MMU-72163                                          | 3     | 2.00  | 22380, 20382, 67337                                                                                                                                                                                                                                                                                                                                                         | 0.317  | 2.576           |
| GOTERM_CC_DIRECT | GO:0030054~cell junction                                         | 7     | 4.67  | 13838, 15424, 12695, 52906, 320664, 13518, 67374                                                                                                                                                                                                                                                                                                                            | 0.319  | 1.498           |

## Supplemental File 4. Continuation.

| Category         | Term                                                  | Count | %     | Genes                                                                                                                                                                                                                                                                                                                                                                                                                | PValue | Fold Enrichment |
|------------------|-------------------------------------------------------|-------|-------|----------------------------------------------------------------------------------------------------------------------------------------------------------------------------------------------------------------------------------------------------------------------------------------------------------------------------------------------------------------------------------------------------------------------|--------|-----------------|
| UP_KEYWORDS      | GTP-binding                                           | 4     | 2.67  | 19342, 74222, 23912, 14681                                                                                                                                                                                                                                                                                                                                                                                           | 0.321  | 1.995           |
| GOTERM_CC_DIRECT | GO:0005578~proteinaceous extracellular matrix         | 4     | 2.67  | 13406, 56693, 22421, 18208                                                                                                                                                                                                                                                                                                                                                                                           | 0.335  | 1.944           |
| UP_KEYWORDS      | Cytokine                                              | 3     | 2.00  | 12164, 257630, 60505                                                                                                                                                                                                                                                                                                                                                                                                 | 0.338  | 2.483           |
| UP_KEYWORDS      | Oxidoreductase                                        | 6     | 4.00  | 66609, 74042, 13086, 50493, 110265, 18105                                                                                                                                                                                                                                                                                                                                                                            | 0.338  | 1.554           |
| GOTERM_CC_DIRECT | GO:0005576~extracellular region                       | 14    | 9.33  | 257630, 14172, 52020, 60505, 18208, 12164, 13406, 76943, 56693, 228413, 19128, 22421, 85031, 629761                                                                                                                                                                                                                                                                                                                  | 0.343  | 1.227           |
| UP_KEYWORDS      | Isopeptide bond                                       | 8     | 5.33  | 16549, 56490, 103963, 20957, 67785, 13518, 68350, 22352                                                                                                                                                                                                                                                                                                                                                              | 0.347  | 1.390           |
| GOTERM_BP_DIRECT | GO:0006397~mRNA processing                            | 4     | 2.67  | 22380, 16549, 20382, 67337                                                                                                                                                                                                                                                                                                                                                                                           | 0.361  | 1.856           |
| UP_KEYWORDS      | Cell junction                                         | 6     | 4.00  | 13838, 12695, 52906, 320664, 13518, 67374                                                                                                                                                                                                                                                                                                                                                                            | 0.364  | 1.503           |
| UP_SEQ_FEATURE   | transmembrane region                                  | 30    | 20.00 | 228993, 14254, 19265, 103963, 73382, 55943, 52020, 67374, 13838, 20499, 214523, 67168, 74488, 227059, 50770, 63959, 68350, 30791, 108115, 106347, 74048, 15247, 76889, 14429, 228413, 12519, 14365, 68510, 215090, 268934                                                                                                                                                                                            | 0.368  | 1.099           |
| GOTERM_CC_DIRECT | GO:0005654~nucleoplasm                                | 15    | 10.00 | 110265, 17764, 17135, 215351, 15424, 22380, 16549, 56490, 70461, 50493, 20957, 67785, 68350, 18105, 233011                                                                                                                                                                                                                                                                                                           | 0.369  | 1.191           |
| UP_SEQ_FEATURE   | active site:Charge relay system                       | 3     | 2.00  | 214523, 73382, 85031                                                                                                                                                                                                                                                                                                                                                                                                 | 0.369  | 2.312           |
| UP_KEYWORDS      | Developmental protein                                 | 8     | 5.33  | 12164, 14254, 13838, 15424, 18223, 14360, 22421, 14365                                                                                                                                                                                                                                                                                                                                                               | 0.369  | 1.357           |
| INTERPRO         | IPR001452:Src homology-3 domain                       | 3     | 2.00  | 52906, 14360, 320664                                                                                                                                                                                                                                                                                                                                                                                                 | 0.373  | 2.295           |
| GOTERM_CC_DIRECT | GO:0015629~actin cytoskeleton                         | 3     | 2.00  | 329251, 110265, 13518                                                                                                                                                                                                                                                                                                                                                                                                | 0.373  | 2.293           |
| GOTERM_BP_DIRECT | GO:0007275~multicellular organism development         | 9     | 6.00  | 12164, 14254, 13838, 15424, 18223, 14360, 67785, 22421, 14365                                                                                                                                                                                                                                                                                                                                                        | 0.375  | 1.307           |
| GOTERM_MF_DIRECT | GO:0004842~ubiquitin-protein transferase activity     | 4     | 2.67  | 142687, 230590, 57855, 68350                                                                                                                                                                                                                                                                                                                                                                                         | 0.379  | 1.799           |
| GOTERM_BP_DIRECT | GO:0042981~regulation of apoptotic process            | 3     | 2.00  | 12164, 14360, 52020                                                                                                                                                                                                                                                                                                                                                                                                  | 0.381  | 2.253           |
| GOTERM_CC_DIRECT | GO:0016607~nuclear speck                              | 3     | 2.00  | 22380, 20382, 20747                                                                                                                                                                                                                                                                                                                                                                                                  | 0.383  | 2.248           |
| UP_KEYWORDS      | Coiled coil                                           | 21    | 14.00 | 16572, 55943, 13518, 72776, 241073, 72043, 17135, 22352, 78748, 74222, 67434, 329251, 110593, 329366, 12695, 18223, 20957, 50770, 57752, 225861, 71844                                                                                                                                                                                                                                                               | 0.385  | 1.130           |
| SMART            | SM00326:SH3                                           | 3     | 2.00  | 52906, 14360, 320664                                                                                                                                                                                                                                                                                                                                                                                                 | 0.389  | 2.205           |
| KEGG_PATHWAY     | mmu05205:Proteoglycans in cancer                      | 3     | 2.00  | 329251, 22421, 14365                                                                                                                                                                                                                                                                                                                                                                                                 | 0.390  | 2.194           |
| GOTERM_MF_DIRECT | GO:0008017~microtubule binding                        | 3     | 2.00  | 16572, 329366, 13518                                                                                                                                                                                                                                                                                                                                                                                                 | 0.393  | 2.199           |
| UP_KEYWORDS      | Membrane                                              | 55    | 36.67 | 103963, 73382, 55943, 628185, 19342, 18570, 259111, 67168, 13086, 104099, 227059, 63959, 68350, 14681, 30791, 319293, 108115, 110265, 15247, 622554, 12519, 228993, 14254, 19265, 52020, 241073, 67374, 106042, 13838, 214523, 20499, 12695, 258713, 24013, 241589, 74488, 19128, 50770, 71844, 13518, 106347, 74048, 14429, 76889, 93708, 23912, 228413, 14360, 258604, 14365, 68510, 14701, 110855, 215090, 268934 | 0.398  | 1.049           |
| UP_SEQ_FEATURE   | nucleotide phosphate-binding region:ATP               | 8     | 5.33  | 16572, 14254, 13838, 27263, 24013, 14360, 22241, 233011                                                                                                                                                                                                                                                                                                                                                              | 0.400  | 1.313           |
| GOTERM_BP_DIRECT | GO:0007155~cell adhesion                              | 5     | 3.33  | 13838, 93708, 104099, 320664, 13518                                                                                                                                                                                                                                                                                                                                                                                  | 0.402  | 1.541           |
| GOTERM_BP_DIRECT | GO:0016192~vesicle-mediated transport                 | 3     | 2.00  | 16572, 52906, 55943                                                                                                                                                                                                                                                                                                                                                                                                  | 0.414  | 2.105           |
| KEGG_PATHWAY     | mmu04015:Rap1 signaling pathway                       | 3     | 2.00  | 14254, 14172, 14681                                                                                                                                                                                                                                                                                                                                                                                                  | 0.415  | 2.081           |
| UP_KEYWORDS      | Ubl conjugation                                       | 11    | 7.33  | 14254, 16549, 56490, 103963, 67785, 55943, 14365, 13518, 68350, 72776, 22352                                                                                                                                                                                                                                                                                                                                         | 0.416  | 1.210           |
| GOTERM_MF_DIRECT | GO:0042802~identical protein binding                  | 6     | 4.00  | 18570, 14254, 235633, 52906, 68350, 22352                                                                                                                                                                                                                                                                                                                                                                            | 0.416  | 1.407           |
| UP_KEYWORDS      | mRNA splicing                                         | 3     | 2.00  | 22380, 16549, 20382                                                                                                                                                                                                                                                                                                                                                                                                  | 0.423  | 2.069           |
| GOTERM_BP_DIRECT | GO:0007166~cell surface receptor signaling pathway    | 3     | 2.00  | 257630, 14360, 14365                                                                                                                                                                                                                                                                                                                                                                                                 | 0.428  | 2.047           |
| GOTERM_CC_DIRECT | GO:0005769~early endosome                             | 3     | 2.00  | 78670, 55943, 50770                                                                                                                                                                                                                                                                                                                                                                                                  | 0.430  | 2.039           |
| UP_KEYWORDS      | Secreted                                              | 12    | 8.00  | 12164, 13406, 76943, 56693, 257630, 14172, 19128, 22421, 60505, 85031, 18208, 629761                                                                                                                                                                                                                                                                                                                                 | 0.430  | 1.179           |
| UP_KEYWORDS      | Neurogenesis                                          | 3     | 2.00  | 13838, 18223, 14365                                                                                                                                                                                                                                                                                                                                                                                                  | 0.437  | 2.011           |
| GOTERM_MF_DIRECT | GO:0000166~nucleotide binding                         | 15    | 10.00 | 14254, 74222, 19342, 13838, 27263, 20382, 24013, 23912, 14360, 22241, 50770, 14681, 233011, 110855, 15526                                                                                                                                                                                                                                                                                                            | 0.438  | 1.136           |
| GOTERM_BP_DIRECT | GO:0006355~regulation of transcription, DNA-templated | 17    | 11.33 | 107823, 100233208, 100041433, 20182, 70081, 433520, 17764, 17135, 110593, 15424, 112415, 16876, 16549, 56490, 70461, 328274, 433791                                                                                                                                                                                                                                                                                  | 0.445  | 1.115           |
| GOTERM_MF_DIRECT | GO:0004871~signal transducer activity                 | 6     | 4.00  | 67168, 14365, 68350, 14681, 14701, 268934                                                                                                                                                                                                                                                                                                                                                                            | 0.447  | 1.357           |
| INTERPRO         | IPR011993:Pleckstrin homology-like domain             | 4     | 2.67  | 331374, 18223, 78670, 19415                                                                                                                                                                                                                                                                                                                                                                                          | 0.458  | 1.586           |
| GOTERM_CC_DIRECT | GO:0005730~nucleolus                                  | 7     | 4.67  | 13406, 14172, 74042, 50493, 59028, 57752, 15526                                                                                                                                                                                                                                                                                                                                                                      | 0.462  | 1.277           |
| GOTERM_CC_DIRECT | GO:0048471~perinuclear region of cytoplasm            | 6     | 4.00  | 19342, 16572, 12695, 55943, 13518, 22352                                                                                                                                                                                                                                                                                                                                                                             | 0.464  | 1.332           |
| UP_KEYWORDS      | Nucleus                                               | 29    | 19.33 | 107823, 20747, 59028, 20182, 17764, 17135, 18570, 13406, 106042, 15424, 16876, 16549, 20382, 20957, 71844, 67337, 15526, 110265, 13518, 215351, 22380, 56490, 622554, 70461, 74042, 14360, 57752, 68510, 233011                                                                                                                                                                                                      | 0.465  | 1.059           |
| UP_KEYWORDS      | Transport                                             | 13    | 8.67  | 19342, 228993, 15247, 20499, 16549, 108115, 227059, 55943, 50770, 63959, 225861, 71844, 30791                                                                                                                                                                                                                                                                                                                        | 0.470  | 1.132           |
| GOTERM_BP_DIRECT | GO:0008380~RNA splicing                               | 3     | 2.00  | 22380, 16549, 20382                                                                                                                                                                                                                                                                                                                                                                                                  | 0.477  | 1.860           |
| INTERPRO         | IPR001849:Pleckstrin homology domain                  | 3     | 2.00  | 331374, 78670, 19415                                                                                                                                                                                                                                                                                                                                                                                                 | 0.478  | 1.857           |
| GOTERM_MF_DIRECT | GO:0005525~GTP binding                                | 4     | 2.67  | 19342, 74222, 23912, 14681                                                                                                                                                                                                                                                                                                                                                                                           | 0.481  | 1.531           |
| SMART            | SM00220:S_TKc                                         | 4     | 2.67  | 13838, 27263, 24013, 22241                                                                                                                                                                                                                                                                                                                                                                                           | 0.482  | 1.524           |
| GOTERM_BP_DIRECT | GO:0008284~positive regulation of cell proliferation  | 5     | 3.33  | 14172, 100040854, 22421, 60505, 18208                                                                                                                                                                                                                                                                                                                                                                                | 0.486  | 1.379           |
| UP_SEQ_FEATURE   | compositionally biased region:Pro-rich                | 6     | 4.00  | 72685, 170753, 50493, 17764, 215090, 69871                                                                                                                                                                                                                                                                                                                                                                           | 0.487  | 1.297           |
| UP_KEYWORDS      | DNA-binding                                           | 11    | 7.33  | 67434, 15424, 107823, 16876, 16549, 56490, 622554, 20957, 20182, 17764, 17135                                                                                                                                                                                                                                                                                                                                        | 0.497  | 1.135           |
| GOTERM_BP_DIRECT | GO:0035556~intracellular signal transduction          | 4     | 2.67  | 142687, 331374, 27263, 19415                                                                                                                                                                                                                                                                                                                                                                                         | 0.498  | 1.494           |
| UP_KEYWORDS      | Endosome                                              | 4     | 2.67  | 18570, 14254, 13838, 50770                                                                                                                                                                                                                                                                                                                                                                                           | 0.498  | 1.495           |
| UP_KEYWORDS      | Receptor                                              | 17    | 11.33 | 19265, 14254, 20182, 106347, 628185, 74048, 13838, 14429, 259111, 67168, 258713, 24013, 104099, 258604, 12519, 14365, 268934                                                                                                                                                                                                                                                                                         | 0.504  | 1.077           |
| SMART            | SM00233:PH                                            | 3     | 2.00  | 331374, 78670, 19415                                                                                                                                                                                                                                                                                                                                                                                                 | 0.517  | 1.717           |
| GOTERM_BP_DIRECT | GO:0043066~negative regulation of apoptotic process   | 5     | 3.33  | 100040854, 24013, 52906, 22421, 68510                                                                                                                                                                                                                                                                                                                                                                                | 0.521  | 1.320           |
| GOTERM_CC_DIRECT | GO:0005634~nucleus                                    | 40    | 26.67 | 14254, 21916, 107823, 14172, 66399, 20747, 59028, 20182, 17764, 17135, 13406, 18570, 106042, 142687, 15424, 16876, 27263, 16549, 170753, 20382, 20957, 71844, 67337, 15526, 217379, 68222, 110265, 13518, 215351, 110593, 22380, 56490, 74042, 70461, 622554, 50493, 14360, 57752, 233011, 68510                                                                                                                     | 0.524  | 1.021           |
| UP_KEYWORDS      | Ubl conjugation pathway                               | 5     | 3.33  | 215351, 18223, 230590, 20747, 68350                                                                                                                                                                                                                                                                                                                                                                                  | 0.526  | 1.312           |

## Supplemental File 4. Continuation.

| Category         | Term                                                                            | Count | %     | Genes                                                                                                                                                                                                                                                                                                               | PValue | Fold Enrichment |
|------------------|---------------------------------------------------------------------------------|-------|-------|---------------------------------------------------------------------------------------------------------------------------------------------------------------------------------------------------------------------------------------------------------------------------------------------------------------------|--------|-----------------|
| GOTERM_MF_DIRECT | GO:0005102~receptor binding                                                     | 4     | 2.67  | 14172, 14360, 22421, 30791                                                                                                                                                                                                                                                                                          | 0.530  | 1.423           |
| UP_KEYWORDS      | Transferase                                                                     | 11    | 7.33  | 14254, 13838, 107823, 76889, 331374, 27263, 24013, 103963, 14360, 22241, 233011                                                                                                                                                                                                                                     | 0.537  | 1.101           |
| GOTERM_BP_DIRECT | GO:0045892~negative regulation of transcription, DNA-templated                  | 5     | 3.33  | 106042, 16876, 100040854, 56490, 223453                                                                                                                                                                                                                                                                             | 0.539  | 1.290           |
| KEGG_PATHWAY     | mmu05166:HTLV-I infection                                                       | 3     | 2.00  | 70461, 22421, 14365                                                                                                                                                                                                                                                                                                 | 0.553  | 1.602           |
| GOTERM_BP_DIRECT | GO:0006810~transport                                                            | 13    | 8.67  | 19342, 228993, 15247, 20499, 16549, 108115, 227059, 55943, 50770, 63959, 225861, 71844, 30791                                                                                                                                                                                                                       | 0.556  | 1.066           |
| GOTERM_MF_DIRECT | GO:0004674~protein serine/threonine kinase activity                             | 4     | 2.67  | 76889, 27263, 24013, 22241                                                                                                                                                                                                                                                                                          | 0.556  | 1.370           |
| UP_KEYWORDS      | Apoptosis                                                                       | 4     | 2.67  | 18570, 18208, 68350, 223453                                                                                                                                                                                                                                                                                         | 0.564  | 1.354           |
| GOTERM_MF_DIRECT | GO:0019901~protein kinase binding                                               | 4     | 2.67  | 329251, 20499, 22241, 22352                                                                                                                                                                                                                                                                                         | 0.566  | 1.351           |
| KEGG_PATHWAY     | mmu04080:Neuroactive ligand-receptor interaction                                | 3     | 2.00  | 14429, 67168, 268934                                                                                                                                                                                                                                                                                                | 0.567  | 1.563           |
| GOTERM_CC_DIRECT | GO:0031012~extracellular matrix                                                 | 3     | 2.00  | 103963, 22352, 15526                                                                                                                                                                                                                                                                                                | 0.569  | 1.567           |
| UP_KEYWORDS      | Cytoplasm                                                                       | 27    | 18.00 | 21916, 320664, 75785, 72776, 78748, 13406, 329251, 106042, 16549, 12695, 18223, 235633, 52906, 22241, 18105, 16572, 110265, 13518, 22352, 74222, 76889, 70461, 23912, 50493, 14360, 57752, 233011                                                                                                                   | 0.570  | 1.015           |
| GOTERM_MF_DIRECT | GO:0005524~ATP binding                                                          | 11    | 7.33  | 16572, 14254, 13838, 331374, 27263, 24013, 14360, 22241, 50770, 233011, 15526                                                                                                                                                                                                                                       | 0.573  | 1.070           |
| GOTERM_CC_DIRECT | GO:0009986~cell surface                                                         | 5     | 3.33  | 13838, 12519, 22421, 14365, 72043                                                                                                                                                                                                                                                                                   | 0.583  | 1.221           |
| GOTERM_CC_DIRECT | GO:0005737~cytoplasm                                                            | 43    | 28.67 | 21916, 14172, 20747, 75785, 320664, 18208, 72776, 13406, 78748, 18570, 329251, 74211, 106042, 142687, 13838, 12695, 16549, 27263, 18223, 235633, 52906, 74488, 67785, 22241, 68350, 18105, 19415, 15526, 16572, 110265, 13518, 22352, 215351, 74222, 76943, 76889, 70461, 50493, 23912, 14360, 57752, 14365, 233011 | 0.595  | 0.996           |
| GOTERM_CC_DIRECT | GO:0005887~integral component of plasma membrane                                | 8     | 5.33  | 14254, 13838, 20499, 67168, 108115, 227059, 63959, 268934                                                                                                                                                                                                                                                           | 0.596  | 1.091           |
| GOTERM_MF_DIRECT | GO:0003677~DNA binding                                                          | 13    | 8.67  | 107823, 20182, 17135, 17764, 67434, 110593, 15424, 16876, 16549, 56490, 622554, 20957, 67785                                                                                                                                                                                                                        | 0.603  | 1.032           |
| INTERPRO         | IPR008271:Serine/threonine-protein kinase, active site                          | 3     | 2.00  | 27263, 24013, 22241                                                                                                                                                                                                                                                                                                 | 0.607  | 1.461           |
| GOTERM_BP_DIRECT | GO:0010468~regulation of gene expression                                        | 3     | 2.00  | 217379, 52020, 22241                                                                                                                                                                                                                                                                                                | 0.609  | 1.456           |
| GOTERM_CC_DIRECT | GO:0009897~external side of plasma membrane                                     | 3     | 2.00  | 74048, 12519, 52020                                                                                                                                                                                                                                                                                                 | 0.610  | 1.454           |
| GOTERM_CC_DIRECT | GO:0030425~dendrite                                                             | 4     | 2.67  | 13838, 16549, 14365, 14681                                                                                                                                                                                                                                                                                          | 0.617  | 1.254           |
| GOTERM_MF_DIRECT | GO:0043565~sequence-specific DNA binding                                        | 5     | 3.33  | 15424, 107823, 16876, 20182, 17135                                                                                                                                                                                                                                                                                  | 0.625  | 1.158           |
| GOTERM_CC_DIRECT | GO:0016324~apical plasma membrane                                               | 3     | 2.00  | 12695, 14365, 63959                                                                                                                                                                                                                                                                                                 | 0.628  | 1.405           |
| GOTERM_CC_DIRECT | GO:0005615~extracellular space                                                  | 10    | 6.67  | 12164, 76943, 14254, 56693, 257630, 19128, 52020, 22421, 60505, 72043                                                                                                                                                                                                                                               | 0.643  | 1.021           |
| GOTERM_BP_DIRECT | GO:0045944~positive regulation of transcription from RNA polymerase II promoter | 7     | 4.67  | 14429, 257630, 70461, 52906, 22421, 20182, 17764                                                                                                                                                                                                                                                                    | 0.653  | 1.051           |
| GOTERM_CC_DIRECT | GO:0005694~chromosome                                                           | 3     | 2.00  | 107823, 622554, 20957                                                                                                                                                                                                                                                                                               | 0.654  | 1.340           |
| UP_KEYWORDS      | Transmembrane                                                                   | 41    | 27.33 | 228993, 14254, 19265, 103963, 73382, 55943, 52020, 628185, 67374, 13838, 20499, 214523, 259111, 258713, 67168, 241589, 104099, 19128, 74488, 227059, 50770, 63959, 68350, 30791, 319293, 108115, 13518, 106347, 74048, 15247, 14429, 76889, 93708, 622554, 228413, 258604, 12519, 14365, 68510, 215090, 268934      | 0.656  | 0.976           |
| GOTERM_BP_DIRECT | GO:0042493~response to drug                                                     | 3     | 2.00  | 14360, 14365, 14681                                                                                                                                                                                                                                                                                                 | 0.661  | 1.322           |
| INTERPRO         | IPR013783:immunoglobulin-like fold                                              | 7     | 4.67  | 74048, 14254, 13838, 12519, 52020, 106347, 67374                                                                                                                                                                                                                                                                    | 0.670  | 1.033           |
| GOTERM_MF_DIRECT | GO:0016740~transferase activity                                                 | 10    | 6.67  | 14254, 13838, 107823, 76889, 27263, 24013, 103963, 14360, 22241, 233011                                                                                                                                                                                                                                             | 0.673  | 0.996           |
| GOTERM_CC_DIRECT | GO:0042995~cell projection                                                      | 5     | 3.33  | 13838, 52906, 75785, 13518, 22352                                                                                                                                                                                                                                                                                   | 0.680  | 1.079           |
| GOTERM_BP_DIRECT | GO:0016567~protein ubiquitination                                               | 3     | 2.00  | 142687, 75785, 68350                                                                                                                                                                                                                                                                                                | 0.696  | 1.238           |
| UP_KEYWORDS      | Serine/threonine-protein kinase                                                 | 3     | 2.00  | 27263, 24013, 22241                                                                                                                                                                                                                                                                                                 | 0.701  | 1.226           |
| UP_KEYWORDS      | Chromosome                                                                      | 3     | 2.00  | 107823, 622554, 20957                                                                                                                                                                                                                                                                                               | 0.707  | 1.214           |
| UP_KEYWORDS      | Transmembrane helix                                                             | 40    | 26.67 | 228993, 14254, 19265, 103963, 73382, 55943, 52020, 628185, 67374, 13838, 20499, 214523, 259111, 258713, 67168, 241589, 104099, 19128, 74488, 227059, 50770, 63959, 68350, 30791, 319293, 108115, 106347, 74048, 15247, 14429, 76889, 93708, 622554, 228413, 258604, 12519, 14365, 68510, 215090, 268934             | 0.716  | 0.954           |
| UP_KEYWORDS      | Endoplasmic reticulum                                                           | 6     | 4.00  | 18570, 103963, 13086, 50770, 13518, 72043                                                                                                                                                                                                                                                                           | 0.719  | 0.996           |
| UP_KEYWORDS      | Ion transport                                                                   | 4     | 2.67  | 20499, 108115, 227059, 30791                                                                                                                                                                                                                                                                                        | 0.721  | 1.070           |
| GOTERM_CC_DIRECT | GO:0005829~cytosol                                                              | 11    | 7.33  | 78748, 106042, 66609, 16549, 217379, 50493, 14360, 22241, 55943, 19415, 22352                                                                                                                                                                                                                                       | 0.726  | 0.947           |
| UP_KEYWORDS      | Cell cycle                                                                      | 4     | 2.67  | 74222, 74042, 20957, 72776                                                                                                                                                                                                                                                                                          | 0.728  | 1.058           |
| GOTERM_BP_DIRECT | GO:0006915~apoptotic process                                                    | 4     | 2.67  | 18570, 18208, 68350, 223453                                                                                                                                                                                                                                                                                         | 0.734  | 1.049           |
| GOTERM_MF_DIRECT | GO:0019899~enzyme binding                                                       | 3     | 2.00  | 13086, 14360, 15526                                                                                                                                                                                                                                                                                                 | 0.737  | 1.145           |
| GOTERM_BP_DIRECT | GO:0010628~positive regulation of gene expression                               | 3     | 2.00  | 52906, 22421, 22352                                                                                                                                                                                                                                                                                                 | 0.746  | 1.124           |
| UP_KEYWORDS      | Differentiation                                                                 | 4     | 2.67  | 12164, 14254, 52906, 19415                                                                                                                                                                                                                                                                                          | 0.748  | 1.025           |
| GOTERM_BP_DIRECT | GO:0006811~ion transport                                                        | 4     | 2.67  | 20499, 108115, 227059, 30791                                                                                                                                                                                                                                                                                        | 0.749  | 1.024           |
| GOTERM_BP_DIRECT | GO:0007283~spermatogenesis                                                      | 3     | 2.00  | 12164, 56693, 20957                                                                                                                                                                                                                                                                                                 | 0.756  | 1.102           |
| GOTERM_CC_DIRECT | GO:0005783~endoplasmic reticulum                                                | 8     | 5.33  | 18570, 13838, 56693, 217379, 103963, 50770, 13518, 72043                                                                                                                                                                                                                                                            | 0.759  | 0.929           |
| INTERPRO         | IPR013083:Zinc finger, RING/FYVE/PHD-type                                       | 3     | 2.00  | 107823, 74042, 68350                                                                                                                                                                                                                                                                                                | 0.760  | 1.093           |
| UP_KEYWORDS      | Transducer                                                                      | 10    | 6.67  | 14429, 259111, 67168, 258713, 258604, 14365, 14681, 628185, 14701, 268934                                                                                                                                                                                                                                           | 0.761  | 0.919           |
| GOTERM_CC_DIRECT | GO:0005813~centrosome                                                           | 3     | 2.00  | 329366, 52906, 72776                                                                                                                                                                                                                                                                                                | 0.775  | 1.059           |
| GOTERM_CC_DIRECT | GO:0043234~protein complex                                                      | 4     | 2.67  | 12695, 19128, 71844, 14681                                                                                                                                                                                                                                                                                          | 0.776  | 0.978           |
| UP_KEYWORDS      | Cell projection                                                                 | 4     | 2.67  | 13838, 52906, 75785, 13518                                                                                                                                                                                                                                                                                          | 0.777  | 0.977           |
| UP_KEYWORDS      | Hydrolase                                                                       | 9     | 6.00  | 72685, 215351, 214523, 73382, 50770, 85031, 110855, 72043, 215090                                                                                                                                                                                                                                                   | 0.779  | 0.905           |
| GOTERM_MF_DIRECT | GO:0016491~oxidoreductase activity                                              | 4     | 2.67  | 66609, 50493, 110265, 18105                                                                                                                                                                                                                                                                                         | 0.780  | 0.971           |
| GOTERM_CC_DIRECT | GO:0031410~cytoplasmic vesicle                                                  | 4     | 2.67  | 18570, 235633, 13518, 268934                                                                                                                                                                                                                                                                                        | 0.792  | 0.951           |
| GOTERM_MF_DIRECT | GO:0042803~protein homodimerization activity                                    | 5     | 3.33  | 18570, 257630, 50493, 13518, 20182                                                                                                                                                                                                                                                                                  | 0.794  | 0.919           |
| INTERPRO         | IPR027417:P-loop containing nucleoside triphosphate hydrolase                   | 5     | 3.33  | 19342, 74222, 16572, 23912, 14681                                                                                                                                                                                                                                                                                   | 0.812  | 0.892           |
| UP_KEYWORDS      | Transit peptide                                                                 | 3     | 2.00  | 66399, 110265, 15526                                                                                                                                                                                                                                                                                                | 0.814  | 0.974           |
| GOTERM_MF_DIRECT | GO:0005515~protein binding                                                      | 25    | 16.67 | 16572, 20747, 13518, 18208, 20182, 17135, 22352, 18570, 74048, 106042, 13838, 16876, 22380, 12695, 235633, 20382, 52906, 14360, 20957, 12519, 22241, 22421, 14365, 14681, 15526                                                                                                                                     | 0.818  | 0.896           |
| GOTERM_CC_DIRECT | GO:0016021~integral component of membrane                                       | 41    | 27.33 | 228993, 14254, 19265, 103963, 73382, 55943, 52020, 628185, 67374, 13838, 20499, 214523, 259111, 258713, 67168, 241589, 104099, 19128, 74488, 227059, 50770, 63959, 68350, 30791, 319293, 108115, 13518, 106347, 74048, 15247, 14429, 76889, 93708, 622554, 228413, 258604, 12519, 14365, 68510, 215090, 268934      | 0.821  | 0.916           |
| GOTERM_MF_DIRECT | GO:0016787~hydrolase activity                                                   | 9     | 6.00  | 72685, 215351, 214523, 73382, 50770, 85031, 110855, 72043, 215090                                                                                                                                                                                                                                                   | 0.824  | 0.861           |
| GOTERM_BP_DIRECT | GO:0055114~oxidation-reduction process                                          | 4     | 2.67  | 66609, 50493, 110265, 18105                                                                                                                                                                                                                                                                                         | 0.831  | 0.884           |
| GOTERM_CC_DIRECT | GO:0070062~extracellular exosome                                                | 15    | 10.00 | 110265, 22352, 18570, 212114, 12695, 93708, 20382, 23912, 50493, 74488, 19128, 85031, 18105, 14701, 15526                                                                                                                                                                                                           | 0.836  | 0.862           |
| GOTERM_CC_DIRECT | GO:0005789~endoplasmic reticulum membrane                                       | 4     | 2.67  | 18570, 103963, 13086, 13518                                                                                                                                                                                                                                                                                         | 0.842  | 0.865           |

## Supplemental File 4. Continuation.

| Category         | Term                                                                            | Count | %     | Genes                                                                                                             | PValue | Fold Enrichment |
|------------------|---------------------------------------------------------------------------------|-------|-------|-------------------------------------------------------------------------------------------------------------------|--------|-----------------|
| GOTERM_MF_DIRECT | GO:0003700~transcription factor activity, sequence-specific DNA binding         | 5     | 3.33  | 15424, 112415, 20182, 17764, 17135                                                                                | 0.854  | 0.830           |
| UP_KEYWORDS      | Acetylation                                                                     | 16    | 10.67 | 16572, 103963, 110265, 17764, 22352, 18570, 19342, 74211, 16549, 20382, 23912, 67785, 68510, 14701, 223453, 15526 | 0.856  | 0.848           |
| INTERPRO         | IPR013106:Immunoglobulin V-set                                                  | 3     | 2.00  | 74048, 12519, 67374                                                                                               | 0.856  | 0.878           |
| UP_KEYWORDS      | Protein transport                                                               | 3     | 2.00  | 19342, 225861, 71844                                                                                              | 0.864  | 0.861           |
| GOTERM_MF_DIRECT | GO:0044822~poly(A) RNA binding                                                  | 6     | 4.00  | 16549, 103963, 66399, 20382, 67337, 15526                                                                         | 0.879  | 0.790           |
| UP_KEYWORDS      | Mitochondrion                                                                   | 5     | 3.33  | 76889, 66399, 110265, 68350, 15526                                                                                | 0.884  | 0.782           |
| UP_KEYWORDS      | Activator                                                                       | 3     | 2.00  | 70461, 74042, 17764                                                                                               | 0.892  | 0.796           |
| GOTERM_BP_DIRECT | GO:0045893~positive regulation of transcription, DNA-templated                  | 3     | 2.00  | 74042, 22421, 17764                                                                                               | 0.899  | 0.778           |
| UP_KEYWORDS      | G-protein coupled receptor                                                      | 8     | 5.33  | 14429, 259111, 67168, 258713, 258604, 14365, 628185, 268934                                                       | 0.905  | 0.761           |
| GOTERM_BP_DIRECT | GO:0015031~protein transport                                                    | 3     | 2.00  | 19342, 225861, 71844                                                                                              | 0.908  | 0.757           |
| GOTERM_BP_DIRECT | GO:0007049~cell cycle                                                           | 3     | 2.00  | 74222, 20957, 72776                                                                                               | 0.918  | 0.730           |
| GOTERM_CC_DIRECT | GO:0005739~mitochondrion                                                        | 8     | 5.33  | 19342, 76889, 66399, 50493, 14360, 110265, 68350, 15526                                                           | 0.935  | 0.714           |
| GOTERM_BP_DIRECT | GO:0007186~G-protein coupled receptor signaling pathway                         | 8     | 5.33  | 259111, 67168, 258713, 258604, 14365, 14681, 14701, 268934                                                        | 0.943  | 0.701           |
| INTERPRO         | IPR000276:G protein-coupled receptor, rhodopsin-like                            | 6     | 4.00  | 14429, 259111, 67168, 319293, 258713, 258604                                                                      | 0.949  | 0.667           |
| GOTERM_BP_DIRECT | GO:0000122~negative regulation of transcription from RNA polymerase II promoter | 3     | 2.00  | 107823, 56490, 20747                                                                                              | 0.957  | 0.615           |
| GOTERM_CC_DIRECT | GO:0043231~intracellular membrane-bounded organelle                             | 3     | 2.00  | 13406, 14360, 50770                                                                                               | 0.957  | 0.614           |
| GOTERM_MF_DIRECT | GO:0004930~G-protein coupled receptor activity                                  | 8     | 5.33  | 259111, 67168, 319293, 258713, 258604, 14365, 628185, 268934                                                      | 0.958  | 0.671           |
| UP_KEYWORDS      | Sensory transduction                                                            | 5     | 3.33  | 259111, 258713, 24013, 258604, 110855                                                                             | 0.960  | 0.627           |
| GOTERM_BP_DIRECT | GO:0030154~cell differentiation                                                 | 3     | 2.00  | 12164, 14254, 19415                                                                                               | 0.968  | 0.575           |
| GOTERM_MF_DIRECT | GO:0003723~RNA binding                                                          | 3     | 2.00  | 16549, 20382, 59028                                                                                               | 0.971  | 0.564           |
| INTERPRO         | IPR017452:GPCR, rhodopsin-like, 7TM                                             | 6     | 4.00  | 14429, 259111, 67168, 319293, 258713, 258604                                                                      | 0.982  | 0.570           |
| KEGG_PATHWAY     | mmu01100:Metabolic pathways                                                     | 4     | 2.67  | 331374, 103963, 13086, 233011                                                                                     | 0.994  | 0.465           |
| GOTERM_CC_DIRECT | GO:0005794~Golgi apparatus                                                      | 3     | 2.00  | 13838, 72043, 215090                                                                                              | 0.997  | 0.387           |

## Supplemental File 5.

Supplemental Methods:

### Western Blot Analysis

Cytoplasmic and nuclear protein fractions were extracted from WT and frozen cells ( $\sim 10 \times 10^6$ ) using the NE-PER kit (Pierce Biotechnology, Rockford, IL) supplemented with phosphatase inhibitors (Pierce Biotechnology, Rockford, IL) and protease inhibitors (Roche Diagnostics, Indianapolis, IN). Protein extracts (40  $\mu$ g) were separated on a precast 4-20% SDSpage gel (BioRad Technologies Inc, Hercules, CA) and transferred to nitrocellulose membranes using the iBlot 2 transfer system (Life Technologies, Carlsbad, CA). The membranes were blocked for 1 hour in 5% milk dissolved in Tris buffered saline containing 0.1% Tween-20 to deter non-specific binding and immunoblotted with 10 mL of diluted primary antibodies as follows: Rabbit polyclonal antibody to SC35 (GeneTex, Irvine, CA) was diluted at 1:500, Rabbit polyclonal antibody to TrkA (Cell Signaling Technology Inc., Danvers, MA) was diluted at 1:200; Rabbit polyclonal antibody to beta-Tubulin (Abcam, Cambridge, MA) was diluted at 1:500. Antibodies were diluted in 1% milk dissolved in Tris buffered saline containing 0.1% Tween-20 and incubated on a rocking table for 24 hours at 4°C. Goat anti-rabbit conjugated IgG-HRP antibody (Jackson ImmunoResearch Laboratories, Inc, West Grove, PA) was used against all primary antibodies. Secondary antibody was diluted 1:4,000 in 1% milk dissolved in Tris buffered saline containing 0.1% Tween-20 and incubated on a rocking table for 1 hour at room temperature. Proteins were visualized by SuperSignal™ West Pico chemiluminescent substrate and monitored using Biospectrum 810 UVP imaging system (UVP LLC, Upland, CA). Densitometry analysis of protein bands was performed using ImageJ software (National Institutes of Health [NIH], <http://rsb.info.nih.gov/ij/>). Bands corresponding to SC35 and TRKA were normalized to the density of respective  $\beta$  -Tubulin bands.

## Supplemental File 6.

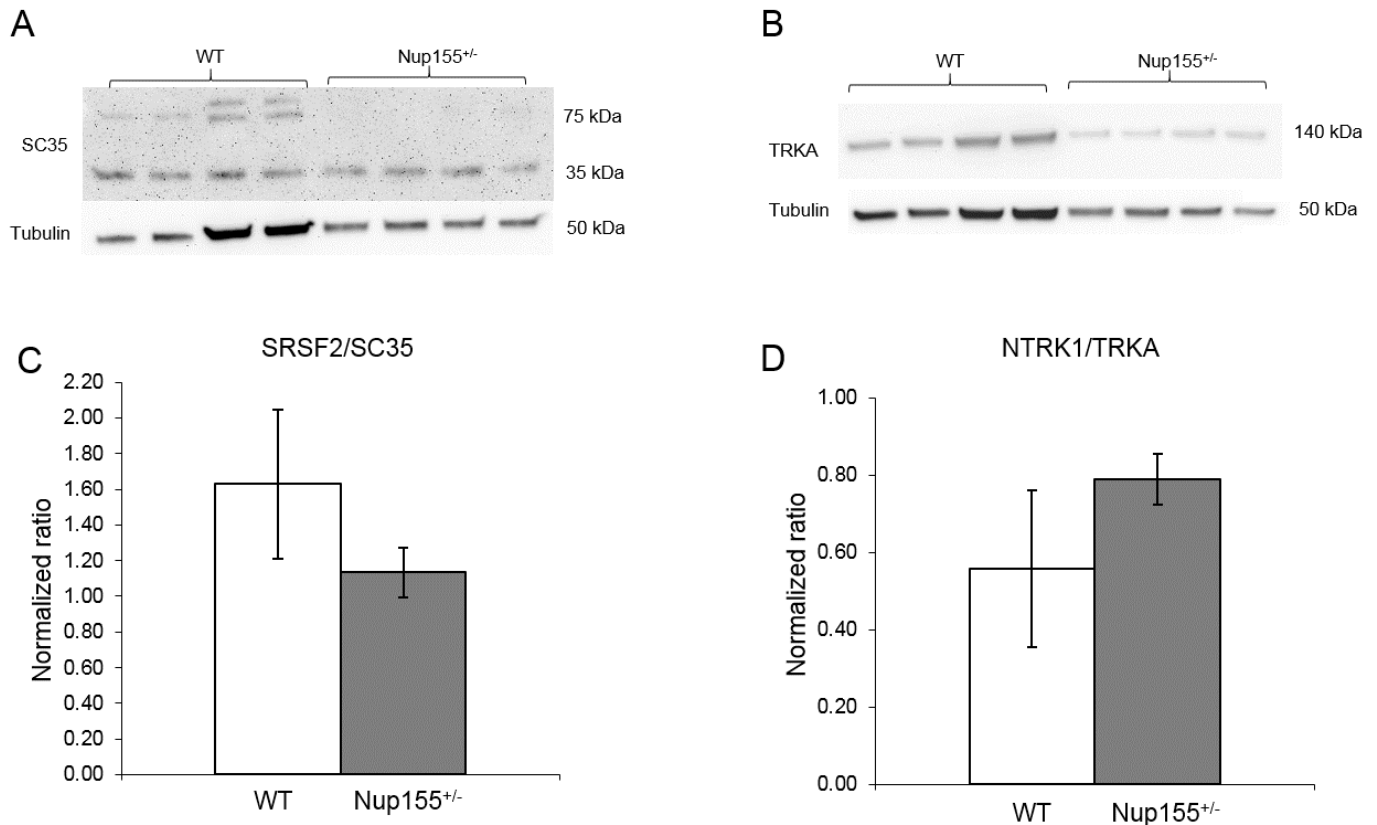

Supplemental Figure. Protein Expression data for SRSF2/SC35 and NTRK1/TRKA. Western blots of (A) SRSF2/SC35 and (B) NTRK1/TRKA from Wild Type (WT, n=4) and Nup155<sup>+/-</sup> (n=4) ES cell lines.  $\beta$  tubulin was used as loading control for both proteins. Comparison of normalized ratios from densitometry analyses of (C) SRSF2/SC35 and (D) NTRK1/TRKA protein levels in WT and Nup155<sup>+/-</sup> cell lines ( $p > 0.05$ ).
